# 1 **Monitoring norepinephrine release *in vivo* using next-** 2 **generation GRAB<sub>NE</sub> sensors**

3 Jiesi Feng<sup>1,2,3\*</sup>, Hui Dong<sup>1,2,3</sup>, Julieta Lischinsky<sup>4</sup>, Jingheng Zhou<sup>5</sup>, Fei Deng<sup>1,2</sup>, Chaowei  
4 Zhuang<sup>6</sup>, Xiaolei Miao<sup>1,2,7</sup>, Huan Wang<sup>1,2</sup>, Hao Xie<sup>6</sup>, Guohong Cui<sup>5</sup>, Dayu Lin<sup>4</sup>, Yulong  
5 Li<sup>1,2,3,8,9,10\*</sup>

6 <sup>1</sup>State Key Laboratory of Membrane Biology, Peking University School of Life Sciences,  
7 Beijing 100871, China

8 <sup>2</sup>PKU-IDG/McGovern Institute for Brain Research, Beijing 100871, China

9 <sup>3</sup>Peking-Tsinghua Center for Life Sciences, New Cornerstone Science Laboratory,  
10 Academy for Advanced Interdisciplinary Studies, Peking University, Beijing 100871, China

11 <sup>4</sup>Neuroscience Institute, New York University School of Medicine, New York, NY 10016,  
12 USA

13 <sup>5</sup>Neurobiology Laboratory, National Institute of Environmental Health Sciences, National  
14 Institutes of Health, Research Triangle Park, NC 27709, USA

15 <sup>6</sup>Department of Automation, Tsinghua University, Beijing 100084, China

16 <sup>7</sup>Department of Anesthesiology, Beijing Chaoyang Hospital, Capital Medical University,  
17 100020 Beijing, China

18 <sup>8</sup>Chinese Institute for Brain Research, Beijing 102206, China

19 <sup>9</sup>Institute of Molecular Physiology, Shenzhen Bay Laboratory, Shenzhen, Guangdong  
20 518055, China

21 <sup>10</sup>National Biomedical Imaging Center, Peking University, Beijing 100871, China

22

23 \*Manuscript correspondence:

24 Jiesi Feng (jiesifeng@pku.edu.cn)

25 Yulong Li (yulongli@pku.edu.cn)

26 **Summary**

27 Norepinephrine (NE) is an essential biogenic monoamine neurotransmitter, yet researches  
28 using prototype NE sensors were limited by their low sensitivities. Here, we developed  
29 next-generation versions of GPCR activation-based NE sensors (GRAB<sub>NE2m</sub> and  
30 GRAB<sub>NE2h</sub>) with a superior response, high sensitivity and selectivity to NE both *in vitro* and  
31 *in vivo*. Notably, these sensors can detect NE release triggered by either optogenetic or  
32 behavioral stimuli in freely moving mice, producing robust signals in the locus coeruleus  
33 and hypothalamus. With the development of a novel transgenic mouse line, we recorded  
34 both NE release and calcium dynamics with dual-color fiber photometry throughout the  
35 sleep-wake cycle; moreover, dual-color mesoscopic imaging revealed cell type-specific  
36 spatiotemporal dynamics of NE and calcium during sensory processing and locomotion.  
37 Thus, these new GRAB<sub>NE</sub> sensors are valuable tools for monitoring the precise  
38 spatiotemporal release of NE *in vivo*, providing new insights into the physiological and  
39 pathophysiological roles of NE.

40

41

42 **Keywords:**

43 GRAB, norepinephrine, neuromodulation, transgenic mouse line, dual-color imaging,  
44 mesoscopic imaging.

## 45 Introduction

46 Norepinephrine (NE) is a monoamine neurotransmitter that plays essential roles in both  
47 the central and peripheral nervous systems, including regulating the sleep-wake cycle<sup>1</sup>,  
48 the stress response<sup>2</sup>, attention<sup>3</sup>, sensory processing<sup>4</sup>, heart rate<sup>5</sup>, and blood pressure<sup>6</sup>.  
49 Previous methods for measuring NE release *in vivo* relied on either specific—but slow—  
50 microdialysis coupled with biomedical identification<sup>7-12</sup> or rapid—but less specific—  
51 electrochemical methods<sup>13-16</sup> such as fast-scan cyclic voltammetry. The development of  
52 CNiFER sensors<sup>17</sup> and FRET-based sensors<sup>18-20</sup> provided a means to optically measure  
53 NE release with high specificity and temporal resolution; however, the use of these tools  
54 has been limited by their undesirable immunogenicity, relatively poor cell-type specificity,  
55 and/or narrow dynamic range.

56 We previously developed a set of genetically encoded G protein–coupled receptor (GPCR)  
57 Activation–Based (GRAB) NE sensors called GRAB<sub>NE1m</sub> and GRAB<sub>NE1h</sub> in which the NE-  
58 induced conformational change in the  $\alpha$ 2AR noradrenergic receptor drives a fluorescence  
59 change in circularly permuted EGFP (cpEGFP)<sup>21</sup>. These fluorescent sensors outperformed  
60 the above traditional methods in sensitivity, selectivity, spatiotemporal resolution, and non-  
61 invasiveness. However, the first generation of GRAB<sub>NE</sub> sensors, GRAB<sub>NE1m</sub> and GRAB<sub>NE1h</sub>,  
62 still had limitations on either molecular sensitivity or selectivity for NE. To further improve  
63 these sensors, we developed next-generation GRAB<sub>NE2m</sub> and GRAB<sub>NE2h</sub> sensors with 4-  
64 fold maximum fluorescence response, nanomolar affinity and more than 200-fold  
65 distinguish ability to dopamine (DA). Importantly, these new sensors have rapid kinetics  
66 and negligible downstream coupling; in addition, when expressed *in vivo* they produce an  
67 up-to 5-fold stronger signal in response to optogenetically and behaviorally stimulated NE  
68 release compared to the previous GRAB<sub>NE</sub> sensors. Moreover, we generated a Cre-  
69 dependent transgenic mouse line expressing both green fluorescent GRAB<sub>NE2m</sub> and the  
70 red fluorescent calcium indicator jRGECO1a<sup>22</sup>, which we then used to simultaneously  
71 monitor cell type–specific NE release and calcium dynamics during the sleep-wake cycle,  
72 sensory processing, and locomotion. Together, these robust new tools can be used to  
73 measure noradrenergic activity under a wide range of physiological and pathophysiological  
74 conditions, providing important new insights into the functional role of NE in both health  
75 and disease.

## 76 Results

### 77 ***Optimization and in vitro characterization of next-generation GRAB<sub>NE</sub> sensors***

78 Our previous fluorescent NE sensors GRAB<sub>NE1m</sub> and GRAB<sub>NE1h</sub> reported endogenous NE  
79 release with high spatiotemporal resolution<sup>21</sup>; however, when used *in vivo* these sensors  
80 have a relatively modest change in fluorescence (~ 5% in response to optogenetic  
81 stimulation in the locus coeruleus), possibly due to low NE sensitivity. GRAB sensors  
82 respond to ligand binding by transducing the receptor's conformational change into a  
83 change in cpEGFP fluorescence. To increase the sensitivity of our GRAB<sub>NE</sub> sensors, we  
84 systematically performed site-directed mutagenesis of more than 20 amino acids in GPCR  
85 backbone and cpEGFP of GRAB<sub>NE1h</sub> and then screened the fluorescence responses of  
86 more than 400 candidate sensors in HEK293T cells using a high-content imaging system.  
87 Among these candidates, one sensor, which we call GRAB<sub>NE2m</sub>, produced the highest  
88 change in fluorescence ( $\Delta F/F_0$ ) in response to NE (Figure 1A). To further increase the  
89 sensor's affinity, we screened sites related to ligand binding and G protein coupling and  
90 identified a high-affinity sensor, which we call GRAB<sub>NE2h</sub> (Figure 1A).

91 Next, we expressed the first-generation GRAB<sub>NE1m</sub> sensor and our second-generation  
92 GRAB<sub>NE2m</sub> and GRAB<sub>NE2h</sub> sensors in HEK293T cells (Figure 1B) and found that applying  
93 100  $\mu\text{M}$  NE induced a peak  $\Delta F/F_0$  of  $230 \pm 9\%$ ,  $381 \pm 23\%$ , and  $415 \pm 25\%$ , respectively  
94 (Figure 1B2); in addition to their stronger response to NE, both GRAB<sub>NE2m</sub> and GRAB<sub>NE2h</sub>  
95 had higher maximum brightness compared to GRAB<sub>NE1m</sub>. In addition, both GRAB<sub>NE2m</sub> and  
96 GRAB<sub>NE2h</sub> retained the pharmacology of the parent  $\alpha 2\text{AR}$  receptor and do not respond to  
97 other neurochemicals, including the  $\beta 2\text{-adrenergic}$  receptor agonist isoprenaline (ISO),  
98 acetylcholine (ACh), serotonin (5-HT), glutamate (Glu),  $\gamma$ -aminobutyric acid (GABA),  
99 adenosine (ADO), or histamine (HA); finally, the NE-induced response was blocked by the  
100  $\alpha 2\text{AR}$  antagonist yohimbine (YO) but not the  $\beta 2\text{AR}$  antagonist ICI-118,551 (ICI) (Figure  
101 S1). To test the performance of our GRAB<sub>NE</sub> sensors in neurons, we expressed GRAB<sub>NE2m</sub>  
102 and GRAB<sub>NE2h</sub> in cultured cortical neurons. We generated dose-response curves for  
103 GRAB<sub>NE2m</sub> and GRAB<sub>NE2h</sub> and measured apparent affinity values of 320 nM and 78 nM,  
104 respectively (with 2-3 folds increase compared to GRAB<sub>NE1m</sub>), in response to NE, with  
105 significantly lower affinity for dopamine (350  $\mu\text{M}$  and 110  $\mu\text{M}$ , respectively) (Figure 1C).  
106 These resulted in an over 1000-fold selectivity to distinguish NE from DA for both  
107 GRAB<sub>NE2m</sub> and GRAB<sub>NE2h</sub>. Both sensors' peak  $\Delta F/F_0$  were consistent with our results  
108 obtained using HEK293T cells (Figure 1D).

109 To determine whether the next-generation GRAB<sub>NE</sub> sensors respond to NE with rapid  
110 kinetics, we locally puffed a saturating concentration of 10  $\mu\text{M}$  NE onto HEK293T cells  
111 expressing either GRAB<sub>NE2m</sub> or GRAB<sub>NE2h</sub> and measured the change in fluorescence using  
112 high-speed line scan imaging (Figure 1E1). Fitting the rising phase of the fluorescence  
113 change using a single exponential function yielded average  $\tau_{\text{on}}$  values of 0.12 s and 0.09 s  
114 for GRAB<sub>NE2m</sub> and GRAB<sub>NE2h</sub>, respectively (Figure 1E2-3). We also fit the decrease in

115 fluorescence following the addition of YO in the presence of NE and obtained average  $\tau_{\text{off}}$   
116 values of 1.72 s and 1.93 s for GRAB<sub>NE2m</sub> and GRAB<sub>NE2h</sub>, respectively. The kinetics of  
117 GRAB<sub>NE2m</sub> and GRAB<sub>NE2h</sub> is a bit slower than GRAB<sub>NE1m</sub><sup>21</sup>, possibly due to the higher  
118 affinity.

119 Next, we measured the spectral properties of GRAB<sub>NE2m</sub> and GRAB<sub>NE2h</sub> using one-photon  
120 excitation. We found that both sensors have excitation peaks at 410 nm and 500 nm, and  
121 an emission peak at 520 nm (Figure 1F), similar to the spectra of GFP and the calcium  
122 indicator GCaMP; thus, our sensors are compatible with various established imaging  
123 systems.

124 Because overexpressed GPCRs or their derivatives may induce downstream signaling,  
125 they have the potential to affect cellular physiology and may therefore be unsuitable for  
126 use in *in vivo* imaging. To rule out this possibility, we examined whether GRAB<sub>NE2m</sub> and  
127 GRAB<sub>NE2h</sub> induce downstream G protein and/or  $\beta$ -arrestin signaling using a luciferase  
128 complementation mini-G protein assay and the Tango assay, respectively (see Methods).  
129 We found that both sensors have negligible downstream coupling (Figure 1G and 1H),  
130 suggesting that overexpressing either GRAB<sub>NE2m</sub> or GRAB<sub>NE2h</sub> does not significantly affect  
131 cellular physiology.

### 132 ***Detection of optogenetically evoked NE release in freely moving mice***

133 Having shown that our next-generation GRAB<sub>NE</sub> sensors have superior sensitivity, high  
134 specificity, rapid kinetics, and negligible downstream coupling *in vitro*, we then examined  
135 whether these sensors can report endogenous NE release *in vivo* when expressed in the  
136 locus coeruleus (LC) of TH-Cre mice together with the optogenetic actuator C1V1 linked  
137 to YFP (Figure 2A). For this experiment, we used spectrally resolved fiber photometry<sup>23</sup> to  
138 simultaneously measure GRAB<sub>NE</sub> and YFP. We found that optogenetic stimulation of LC-  
139 NE neurons elicited increases in GRAB<sub>NE2m</sub> and GRAB<sub>NE2h</sub> fluorescence in freely moving  
140 mice, but had no effect on YFP fluorescence (Figure 2B and 2C1). In addition, an  
141 intraperitoneal (i.p.) injection of the norepinephrine transporter (NET) inhibitor desipramine  
142 caused a progressive increase in the basal fluorescence of GRAB<sub>NE2h</sub>, reflecting an  
143 accumulation of extracellular NE and the high affinity of GRAB<sub>NE2h</sub> for NE (Figure 2B);  
144 moreover, in the presence of desipramine the response induced by optogenetic stimulation  
145 was larger in magnitude and had slower decay kinetics (Figure 2C2). Conversely, an i.p.  
146 injection of the  $\alpha$ 2AR antagonist YO nearly abolished both the desipramine-induced  
147 increase in basal fluorescence and the optogenetic stimulation-evoked increase in  
148 GRAB<sub>NE2m</sub> and GRAB<sub>NE2h</sub> fluorescence (Figure 2B and 2C3). In separate experiments, we  
149 injected the mice with either the selective dopamine transporter (DAT) inhibitor GBR-12909  
150 followed by the D2R-specific antagonist eticlopride, which had no effect on basal  
151 fluorescence (data not shown) or the kinetics or magnitude of the optogenetically  
152 stimulated increase in GRAB<sub>NE2m</sub> and GRAB<sub>NE2h</sub> fluorescence (Figure 2C-E). Importantly,  
153 we found that GRAB<sub>NE2m</sub> and GRAB<sub>NE2h</sub> had an ~17% and 24% increase in  $\Delta F/F_0$ ,

154 respectively, in response to a single train of light pulses (Figure 2D), a 2.4-3.9-fold  
155 improvement over the first-generation GRAB<sub>NE1m</sub> sensor. These results suggest that our  
156 next-generation GRAB<sub>NE</sub> sensors can reliably detect optogenetically evoked NE release in  
157 the LC of freely moving mice.

### 158 ***Next-generation NE sensors report behaviorally evoked NE release in vivo in*** 159 ***response to stressful stimuli***

160 The lateral hypothalamus (LH) is a target of the LC and has been shown to release NE  
161 during specific behaviors such as stress<sup>21</sup>. We therefore examined whether our next-  
162 generation GRAB<sub>NE</sub> sensors can exhibit higher signals in measuring behaviorally evoked  
163 NE release in the LH of freely moving mice. We expressed GRAB<sub>NE1m</sub>, GRAB<sub>NE2m</sub>, or  
164 GRAB<sub>NE2h</sub> in the LH of wild-type mice (Figure 3A and 3B) and then performed fiber  
165 photometry recordings during stress-inducing activities, including tail suspension (Figure  
166 3C), forced swimming (Figure 3D), and hand presentation (Figure 3E). Consistent with  
167 previous reports<sup>21</sup>, all three stressors elicited an increase in GRAB<sub>NE</sub> fluorescence.  
168 Moreover, both GRAB<sub>NE2m</sub> and GRAB<sub>NE2h</sub> had a larger response (up-to 3.7-fold) during tail  
169 suspension than GRAB<sub>NE1m</sub> (Figure 3C). Interestingly, GRAB<sub>NE2h</sub> had the largest response  
170 among all three sensors during both forced swimming and hand presentation (Figure 3C  
171 and 3E). In addition, an i.p. injection of the selective NET inhibitor atomoxetine induced a  
172 slow decay in the response to tail suspension, without significantly affecting peak  $\Delta F/F_0$ ; in  
173 contrast, the  $\alpha 2AR$  antagonist YO significantly reduced the tail suspension–evoked  
174 increase in GRAB<sub>NE2m</sub> and GRAB<sub>NE2h</sub> fluorescence (Figure 3F1 and 3G1). Finally, neither  
175 the selective DAT blocker GBR-12909 nor the D2R antagonist sulpiride affected the  
176 magnitude or kinetics of the response (Figure 3F2 and 3G2). These results indicate that  
177 our next-generation GRAB<sub>NE</sub> sensors can be used to specifically monitor the release of  
178 endogenous NE in the LH in response to stress.

### 179 ***NE and calcium dynamics during the sleep-wake cycle***

180 Genetically encoded GRAB<sub>NE</sub> sensors can also be used to examine the spatiotemporal  
181 dynamics of NE release in the brain, which is a tightly regulated, complex process that can  
182 depend on a variety of factors such as the state of arousal and the activation of distinct  
183 brain regions. Moreover, previous studies suggested that specific brain regions may have  
184 either similar or distinct patterns of neurotransmitter release during the sleep-wake cycle<sup>24-</sup>  
185 <sup>26</sup>. To measure the dynamics of NE release in specific brain regions and determine whether  
186 this release is synchronized between brain regions, we utilized expressed GRAB<sub>NE2m</sub> to  
187 simultaneously monitor NE levels in both the medial prefrontal cortex (mPFC) and the  
188 preoptic area of the hypothalamus (POA) (Figure 4A), two brain regions critically involved  
189 in regulating arousal and wakefulness. Meanwhile, we used electroencephalogram (EEG)  
190 and electromyogram (EMG) recordings to determine the animal's sleep-wake state—i.e.,  
191 awake, in NREM (non-rapid eye movement) sleep, or in REM (rapid eye movement) sleep.  
192 Dual-site continuous fiber photometry recording revealed that the changes in NE levels

193 were closely synchronized between the mPFC and POA throughout the sleep-wake cycle  
194 (Figure 4B-D). Specifically, NE levels were relatively high during the wakefulness and  
195 NREM sleep, but low during REM sleep (Figure 4C), which is consistent with previous  
196 results<sup>24,25</sup>. To analyze NE kinetics during the various state transitions, we calculated the  
197  $t_{50}$  from each fluorescence trace and found similar kinetics between the mPFC and POA,  
198 with a rapid increase in NE release during the transition from REM sleep to the awake state  
199 (~5 s) and from NREM sleep to the awake state (~4 s), suggesting rapid NE release during  
200 arousal (Figure 4E-F). In contrast, the decrease in NE release was relatively slow during  
201 the transition from the awake state to NREM sleep (~22 s) and from NREM sleep to REM  
202 sleep (~30 s).

203 Although using virus injection to express genetically encoded sensors has several  
204 advantages, this approach also has several practical limitations, including the need for  
205 invasive surgery to inject the virus, limited region of delivery, variable levels of expression,  
206 and potential long-term cytotoxicity. To overcome these limitations, we generated a  
207 transgenic mouse line that expresses floxed GRAB<sub>NE2m</sub> and jRGECO1a<sup>27</sup>—a red  
208 fluorescent calcium indicator—driven by the ubiquitous CAG promoter and targeted to the  
209 *Rosa26* locus<sup>28-30</sup>. Upon Cre expression, the cells in these mice express both GRAB<sub>NE2m</sub>  
210 and jRGECO1a; these mice are referred to hereafter as dual-NECa mice (Figure 4G).

211 First, we virally expressed Cre in the mPFC of dual-NECa mice and used dual-color fiber  
212 photometry recording to measure both NE and calcium while monitoring the sleep-wake  
213 state using EEG and EMG (Figure 4H). We found that the GRAB<sub>NE2m</sub> sensor expressed in  
214 the mPFC of our dual-NECa mice faithfully reported NE release throughout the sleep-wake  
215 cycle, consistent with previous reports<sup>24,25</sup>. In addition, by measuring jRGECO1a  
216 fluorescence we observed relatively higher noradrenergic and calcium activities during the  
217 awake state, low noradrenergic and calcium activities during REM sleep, and distinct  
218 patterns of oscillatory NE release and relatively low calcium activity during NREM sleep  
219 (Figure 4I-J).

220 Importantly, neither the amplitude nor the kinetics of the NE signals measured in the dual-  
221 NECa transgenic mice differed significantly from the signals measured in mPFC neurons  
222 expressing GRAB<sub>NE2m</sub> via AAV-mediated delivery (Figure 4I-K). Furthermore, the NE  
223 signals recorded in the dual-NECa mice had lower within-group variation than that of viral  
224 expression (Figure 4L). Taken together, these findings indicate that our dual-NECa  
225 transgenic mouse line is a useful tool to consistently report NE release and calcium  
226 dynamics simultaneously with spatial precision.

### 227 ***Mesosopic NE and calcium dynamics in dorsal cortex of awake mice***

228 Another advantage of our dual-NECa mouse is that it can be crossed with established Cre-  
229 driver lines to express both GRAB<sub>NE2m</sub> and jRGECO1a in specific cell types. Currently,  
230 approximately 500 Cre-driver lines are available from the Jackson Laboratory that express  
231 reporter genes either globally or in specific cell types and/or tissues throughout the central



232 nervous system or periphery. We first crossed our dual-NECa reporter mouse with the  
233 CaMKII $\alpha$ -Cre mouse (Figure 5A, top) in order to measure NE release and calcium  
234 dynamics specifically in excitatory neurons. The heterozygous mouse strain displays a  
235 healthy phenotype, with no significant abnormalities or defects in terms of growth, behavior,  
236 and reproduction. Noradrenergic neurons in the LC, which project to the entire brain and  
237 modulate a wide range of behaviors, including attention, stress, and cognition, have been  
238 reported to have high molecular and functional heterogeneity<sup>31,32</sup>; thus, the pattern of NE  
239 release during these behaviors has remained poorly understood. Based on the one-photon  
240 spectra of GRAB<sub>NE2m</sub> and jRGECO1a (Figure 5A, bottom), we performed cortex-wide two-  
241 channel imaging mesoscopy using 488-nm and 561-nm lasers to excite GRAB<sub>NE2m</sub> and  
242 jRGECO1a, with an additional 405-nm laser signal used to correct for hemodynamic  
243 changes in the cortex<sup>33</sup> (Figure 5B, see Methods).

244 To confirm that the change in fluorescence measured using dual-color mesoscopy was  
245 specific for NE, we applied auditory stimuli to mice expressing either GRAB<sub>NE2m</sub> or our  
246 previously reported NE-insensitive mutant sensor, GRAB<sub>NEmut</sub><sup>21</sup>. We applied a 1-second  
247 pulse of white noise as the auditory stimulus and measured green fluorescence through a  
248 6-mm x 8-mm D-shaped cranial window; we also used an infrared camera to record pupil  
249 size to confirm the mouse's autonomic response to the auditory pulse (Figure 5C, top). We  
250 first verified that both GRAB<sub>NE2m</sub> and GRAB<sub>NEmut</sub> were expressed throughout the cerebral  
251 cortex (Figure 5C, bottom and Figure S2A). We then found that application of the auditory  
252 pulse induced a time-locked increase in fluorescence in the mice expressing GRAB<sub>NE2m</sub>,  
253 but had no effect in mice expressing GRAB<sub>NEmut</sub> (Figure 5D). In contrast, the auditory pulse  
254 caused an increase in pupil diameter in both groups, indicating the presence of a general  
255 arousal response (Figure S2B). In addition, the relatively homogenous pattern of NE  
256 release in the cortex induced by the auditory stimulation (Figure 5D) is consistent with the  
257 reported distribution of LC fibers throughout the cortex<sup>34</sup>.

258 Next, to measure cell type-specific noradrenergic and calcium signaling in response to  
259 tactile stimuli, we crossed our dual-NECa mouse line with mice expressing CaMKII $\alpha$ -Cre  
260 or GFAP-Cre to drive the expression of both GRAB<sub>NE2m</sub> and jRGECO1a in excitatory  
261 neurons and astrocytes, respectively; we then performed mesoscopic imaging and  
262 measured the change in NE and calcium in response to unilateral whisker stimulation  
263 (Figure 5E). In the CaMKII $\alpha$ ::NECa mice, we observed a time-locked global increase in  
264 GRAB<sub>NE2m</sub> fluorescence throughout the dorsal cortex, while the calcium signal increased  
265 only in the contralateral hemisphere, consistent with thalamocortical projections (Figure  
266 5E). In addition, bilateral whisker stimulation induced a symmetrical concurrent increase in  
267 both NE and calcium (Figure 5F and Figure S3A1). In contrast, we observed a similar  
268 global increase in GRAB<sub>NE2m</sub> fluorescence in the GFAP::NECa mice, but a relatively small  
269 and delayed calcium signal increase during unilateral and bilateral whisker stimulation  
270 (Figure 5E, 5F, and Figure S3A2).

271 As a further test of the effect of sensory stimuli on NE and calcium signaling in different cell



272 types, we delivered either binocular or monocular visual stimuli to these mice. In the  
273 CaMKII $\alpha$ ::NECa mice, monocular visual stimulation induced an increase in calcium in the  
274 contralateral visual cortex (Figure S3C). Interestingly, however, binocular visual stimulation  
275 induced a small but measurable global increase in GRAB<sub>NE2m</sub> fluorescence throughout the  
276 cortex, while monocular stimulation had no effect on either hemisphere. In contrast, visual  
277 stimulation had no effect on either NE or calcium signaling in the GFAP::NECa mice (Figure  
278 S3B). Thus, dual-color mesoscopic imaging of our dual-NECa transgenic mice revealed  
279 cell type-specific differences in the spatiotemporal patterns of NE and calcium signaling in  
280 response to distinct sensory inputs, providing valuable insights into the underlying neural  
281 circuitry.

282 Finally, we examined NE and calcium signaling in response to spontaneous locomotor  
283 activity using the EMG data and the speed of the linear treadmill as a measure of the onset  
284 and duration of locomotion, respectively. In the CaMKII $\alpha$ ::NECa mice, we found that both  
285 the NE and calcium signals increased in the dorsal cortex with increased locomotor activity  
286 (Figure 5G1); similar results were obtained in the GFAP::NECa mice (Figure 5H1). We then  
287 aligned and averaged the peak response images of both the NE and calcium signals  
288 obtained from each mouse during locomotion, and then segmented the dorsal cortex into  
289 distinct brain regions using the Allen Brain Atlas (Figure 5G2-H3). We found that in both  
290 the CaMKII $\alpha$ ::NECa and GFAP::NECa mice NE was released globally, with a high  
291 Spearman coefficient throughout the cortex (Figure 5I). In contrast, the calcium signal  
292 increased in the sensorimotor cortex in “hotspots” in the CaMKII $\alpha$ ::NECa mice, while the  
293 calcium signal increased globally in the GFAP::NECa mice with an ~2.75 second delay  
294 following the onset of locomotion (Figure 5J). These results shed new light on the intricate  
295 interplay between NE and calcium signaling in the brain during distinct behaviors.

## 296 Discussion

297 Here, we developed an optimized set of next-generation GRAB<sub>NE</sub> sensors with an  
298 increased response, sensitivity, and molecular selectivity for NE. We then used these new  
299 sensors to detect optogenetically and behaviorally triggered NE release in the locus  
300 coeruleus and lateral hypothalamus of freely moving mice. In addition, we developed a  
301 novel transgenic mouse line expressing both GRAB<sub>NE2m</sub> and the calcium sensor  
302 jRGECO1a in specific cell types and performed simultaneous dual-color recording and cell  
303 type-specific spatiotemporal imaging of NE and calcium signaling during the sleep-wake  
304 cycle, sensory processing, and locomotion in behaving mice.

305 Given the structural similarity and widespread patterns of NE and DA throughout the brain,  
306 distinguishing these two monoamines is essential when performing *in vivo* behavioral  
307 studies. Moreover, because human noradrenergic receptors respond to both NE and DA,  
308 our goal is to increase the sensitivity of our GRAB<sub>NE</sub> sensors to NE while reducing their  
309 response to DA. Using cell-based screening, we identified specific combinations of  
310 mutations that increased the sensors' sensitivity to NE without compromising their  
311 selectivity, underscoring the power of high-throughput screening in navigating complex  
312 chemical spaces. Moreover, consistent with our *in vitro* results, our next-generation  
313 GRAB<sub>NE</sub> sensors produce robust *in vivo* signals in response to both optogenetic stimulation  
314 and behavioral events.

315 Importantly, our dual-NECa transgenic mouse allows for the simultaneous monitoring of  
316 NE and calcium signaling in specific cell types and brain regions with high spatiotemporal  
317 resolution during a wide variety of physiological conditions and stimuli. Although the  
318 sensors' expression levels are presumably lower compared to AAV-mediated expression,  
319 the dual-NECa mice revealed similar changes in NE dynamics throughout the sleep-wake  
320 cycle, encompassing the signal amplitude and kinetics during state transitions. Moreover,  
321 a clear advantage of the dual-NECa mice is that the signals obtained have considerably  
322 lower within-group variance compared to viral expression, reflecting the reliability and high  
323 replicability of using the dual-NECa mouse to image NE and calcium signaling.  
324 Furthermore, this transgenic mouse line can be used to express the NE and calcium  
325 sensors in virtually any cell type and/or tissue by crossing with specific Cre-reporter mice.

326 Finally, using dual-color mesoscopic imaging of dual-NECa mice, we observed global  
327 versus "hotspot" patterns of NE release and cell type-specific calcium signaling during  
328 distinct sensory processing events and locomotion. Thus, integrating cortex-wide imaging  
329 with our dual-NECa reporter mice offers a unique opportunity to examine NE and calcium  
330 signaling on a large scale with both cell type and molecular specificity in a wide range of  
331 physiological and pathophysiological contexts.

## 332 **Acknowledgments**

333 This work was supported by the National Key R&D Program of China (2021YFF0502904  
334 to J.F.), the National Natural Science Foundation of China (31925017 and 31871087 to  
335 Y.L.). The study was also supported by grants from the NIH BRAIN Initiative  
336 (U01NS120824 to Y.L.), the Feng Foundation of Biomedical Research, the Clement and  
337 Xinxin Foundation, the Peking-Tsinghua Center for Life Sciences, the State Key Laboratory  
338 of Membrane Biology at Peking University School of Life Sciences, and the New  
339 Cornerstone Science Foundation through the New Cornerstone Investigator Program and  
340 the XPLOER PRIZE (to Y.L.), the Leon Levy Neuroscience Fellowship and NIMH  
341 K99MH127295 grants (J.E.L), U01NS113358 and U01NS103558 (D.L.), and the  
342 Intramural Research Program of the NIH/NIEHS of the United States (1ZIAES103310 to  
343 G.C.). We thank Xiaoguang Lei at PKU-CLS and the National Center for Protein Sciences  
344 at Peking University in Beijing, China, for their support and assistance with the Opera  
345 Phenix high-content screening system and imaging platform. We thank Yueyue Yu for help  
346 with maintaining the transgenic mice.

## 347 **Author contributions**

348 Y.L. supervised the project. J.F. and Y.L. designed the study. J.F. and H.W. performed the  
349 experiments related to sensor optimization and characterization in cultured HEK293T cells  
350 and neurons. J.F. designed and constructed the dual-NECa transgenic mouse line. H.D.  
351 and X.M. performed the experiments related to the sleep-wake cycle. J.Z., and G.C.  
352 designed and performed the optogenetic stimulation experiments. J.L. and D.L. designed  
353 and performed the experiments involving behavior-related recording. J.F. and F.D.  
354 designed and performed the mesoscopic imaging experiments with help from H.X., C.Z.  
355 All authors contributed to the data interpretation and data analysis. J.F. and Y. L. wrote the  
356 manuscript with input from all other authors.

## 357 **Declaration of interest**

358 The authors declare no competing interests.

359 **Figure legends**

360 **Figure 1. Optimization and *in vitro* characterization of next-generation GRAB<sub>NE</sub>**  
361 **sensors.**

362 (A) I: Optimization of GRAB<sub>NE</sub> sensors by introducing random mutations at the interface  
363 between  $\alpha 2AR$  and cpEGFP. The first-generation GRAB<sub>NE1m</sub> and GRAB<sub>NE1h</sub> sensors, as  
364 well as the next-generation GRAB<sub>NE2m</sub> sensor, are indicated. II: Further optimization to yield  
365 GRAB<sub>NE</sub> sensors with increased ligand affinity, with relative ligand affinity plotted against  
366  $\Delta F/F_0$  (normalized to GRAB<sub>NE2h</sub>). The various mutations are indicated, as well as GRAB<sub>NE1h</sub>,  
367 GRAB<sub>NE2m</sub>, and GRAB<sub>NE2h</sub> sensors.

368 (B1) Images of cultured HEK293T cells expressing GRAB<sub>NE1m</sub>, GRAB<sub>NE2m</sub>, or GRAB<sub>NE2h</sub>.  
369 The top row shows baseline fluorescence, while the bottom row shows the change in  
370 fluorescence ( $\Delta F/F_0$ ) in response to 100  $\mu M$  NE. (B2) Summary of  $\Delta F/F_0$ ; n = 20 cells from  
371 3 cultures per group.

372 (C) Normalized dose-response curves for GRAB<sub>NE2m</sub> (left) and GRAB<sub>NE2h</sub> (right) in  
373 response to NE and DA, respectively, in cultured cortical neurons. The corresponding EC<sub>50</sub>  
374 values and fold change in EC<sub>50</sub> between NE and DA are indicated. n = 3 independent  
375 cultures each.

376 (D) Same as (B), except the sensors were expressed in cultured cortical neurons; n = 20  
377 neurons from 3 cultures per group.

378 (E) The on and off kinetics of the change in fluorescence were measured using high-speed  
379 line scan imaging of HEK293T cells expressing GRAB<sub>NE2m</sub> or GRAB<sub>NE2h</sub>;  $\tau_{on}$  was measured  
380 by fitting the rise in fluorescence upon rapid application of NE, and  $\tau_{off}$  was measured by  
381 fitting the fluorescence decay upon application of the  $\alpha 2AR$  antagonist yohimbine (YO)  
382 in the continued presence of NE. E1 shows the experimental setup, including the line-  
383 scanning region and the pipette for rapid drug application. E2 and E3 show representative  
384 traces and the summary data, respectively; n  $\geq$  3 cells from 3 cultures per group.

385 (F) Excitation (blue) and emission (green) spectra of GRAB<sub>NE2m</sub> (left) and GRAB<sub>NE2h</sub> (right)  
386 in the absence (dashed lines) and presence (solid lines) of 100  $\mu M$  NE using one-photon  
387 imaging.

388 (G) Summary of relative dose-dependent downstream G protein coupling of the wild-type  
389  $\alpha 2$  adrenergic receptor (WT- $\alpha 2AR$ ), GRAB<sub>NE2m</sub>, and GRAB<sub>NE2h</sub> expressed in HEK293T  
390 cells measured using the luciferase complementation mini-G protein assay. n = 3 wells with  
391  $\geq 10^5$  cells each.

392 (H) Summary of relative dose-dependent downstream  $\beta$ -arrestin coupling of WT- $\alpha 2AR$ ,  
393 GRAB<sub>NE2m</sub>, and GRAB<sub>NE2h</sub> expressed in HEK293T cells measured using the Tango assay.  
394 n = 3 wells with  $\geq 10^5$  cells each.

395 The scale bars in (A) and (E) represent 20  $\mu\text{m}$ ; the scale bar in (D) represents 50  $\mu\text{m}$ .  
396 Unless noted, summary data are presented as the mean  $\pm$  SEM. \*\*\* $p < 0.001$ , \* $p < 0.05$ ,  
397 and n.s., not significant (Student's  $t$ -test and two-way ANOVA). See also Figure S1.

398 **Figure 2. Detection of optogenetically evoked NE release in freely moving mice.**

399 (A) Experimental design depicting the strategy for expressing GRAB<sub>NE2m</sub> and GRAB<sub>NE2h</sub>  
400 and recording the change in fluorescence in response to optical stimulation of C1V1 in the  
401 locus coeruleus (LC).

402 (B) Representative traces of optogenetically stimulated fluorescence change in GRAB<sub>NE2m</sub>  
403 (red), GRAB<sub>NE2h</sub> (blue), and YFP (olive, as a negative control) in the LC before (baseline,  
404 left), after an i.p. injection of the NE transporter (NET) blocker desipramine (Desi, 10 mg/kg,  
405 middle), and after an i.p. injection of the  $\alpha$ 2AR antagonist yohimbine (YO, 2 mg/kg, right).  
406 The vertical tick marks (yellow) indicate the optogenetic stimuli delivered at 20 Hz.

407 (C-E) Average traces (C), summary of  $\Delta F/F_0$  (D), and summary of decay time constants  
408 (E) of the change in fluorescence of GRAB<sub>NE2m</sub> (top row in C, red) and GRAB<sub>NE2h</sub> (bottom  
409 row in C, blue) in response to optical stimulation in the LC following treatment with the  
410 indicated compounds. Also shown in (C) are the fluorescence traces for YFP. The data for  
411 GRAB<sub>NE1m</sub> in (D) and (E) were reproduced<sup>21</sup> for comparison. n = 15 trials in 3 mice per  
412 group. GBR, GBR-12909; Etic, eticlopride.

413 \*\*\* $p < 0.001$ , \*\* $p < 0.01$ , \* $p < 0.05$ , and n.s., not significant (two-way ANOVA).



414 **Figure 3. Next-generation NE Sensors report behaviorally evoked NE release *in vivo***  
415 **in response to stressful stimuli.**

416 (A) Schematic diagram depicting the strategy for virus injection, fiber placement, and the  
417 recording site for GRAB<sub>NE1m</sub>, GRAB<sub>NE2m</sub>, or GRAB<sub>NE2h</sub> in the lateral hypothalamus (LH).

418 (B) Fluorescence images of brain sections of mice injected with virus expressing the  
419 indicated GRAB<sub>NE</sub> sensors (green); the nuclei were counterstained with DAPI (blue). The  
420 position of the fiber is indicated by dashed white rectangles. Scale bar = 500  $\mu$ m.

421 (C-E) Representative traces (1), averaged per-stimulus histograms (2), and summary data  
422 (3) of GRAB<sub>NE</sub> fluorescence ( $\Delta F/F_0$ ) measured before, during, and after tail suspension (C),  
423 before and during forced swimming (D), and before, during, and after hand presentation  
424 (E);  $n \geq 3$  animals per group. The shaded bars in (C-E) indicate hand presentation to deliver  
425 respective stimuli. The grey dashed lines in (C-E) indicate the onset of respective stimuli.

426 (F-G) Averaged per-stimulus histograms (left), summary data in GRAB<sub>NE</sub> fluorescence  
427 ( $\Delta F/F_0$ ) (middle), and post-test decay time (right) measured in mice expressing GRAB<sub>NE2m</sub>  
428 (F) or GRAB<sub>NE2h</sub> (G) in the LC during the tail suspension test 25 mins after an i.p. injection  
429 of saline (Sal), atomoxetine (ATX), yohimbine (YO), GBR-12909 (GBR), or eticlopride (Etic)  
430 as indicated;  $n \geq 3$  animals per group.

431 \*\*\* $p < 0.001$ , \*\* $p < 0.01$ , \* $p < 0.05$ , and n.s., not significant (Student's *t*-test).

432 **Figure 4. NE and calcium dynamics during the sleep-wake cycle.**

433 (A) Illustration depicting the strategy for virus injection and fiber placement for recording  
434 GRAB<sub>NE2m</sub> fluorescence in both the medial prefrontal cortex (mPFC) and preoptic area of  
435 the hypothalamus (POA) during the sleep-wake cycle. The LC and its projections to the  
436 mPFC and POA are also indicated.

437 (B-C) Representative traces of the GRAB<sub>NE2m</sub> fluorescence signal (expressed as a z-score),  
438 EEG, and EMG recordings (B) and summary data of GRAB<sub>NE2m</sub> fluorescence measured in  
439 mPFC and POA during the wake state, NREM sleep, and REM sleep (C).

440 (D) Cross-correlation between GRAB<sub>NE2m</sub> fluorescence measured in the mPFC and  
441 GRAB<sub>NE2m</sub> fluorescence measured in the POA; also shown are the same raw data after  
442 being randomly shuffled.

443 (E) Representative time courses of the GRAB<sub>NE2m</sub> fluorescence signal measured in the  
444 mPFC and POA during the indicated transitions between the indicated sleep-wake states.

445 (F) Summary data (left) and summary model (right) of the  $t_{50}$  values measured for each  
446 transition between the indicated sleep-wake states.

447 (G) Strategy used to generate the dual-NECa transgenic knock-in mouse line expressing  
448 both GRAB<sub>NE2m</sub> and jRGECO1a in the *Rosa26* locus.

449 (H) Schematic illustration depicting the strategy used for virus injection and dual-color fiber  
450 photometry recording of GRAB<sub>NE2m</sub> and jRGECO1a in the mPFC of dual-NECa transgenic  
451 mice (top) or wild-type (WT) mice (bottom) during the sleep-wake cycle.

452 (I-K) Representative jRGECO1a, GRAB<sub>NE2m</sub>, EEG, and EMG traces (1), expanded traces  
453 (2) based on the dashed rectangle in (1), and summary (K) of the jRGECO1a and  
454 GRAB<sub>NE2m</sub> signals measured in dual-NECa transgenic mice (I) or WT mice virally  
455 expressing GRAB<sub>NE2m</sub> (J) during the awake state, NREM sleep, and REM sleep.

456 (L) Coefficient of variation (CV) between the transgenic GRAB<sub>NE2m</sub> and virally expressed  
457 GRAB<sub>NE2m</sub> signals measured during the sleep-wake cycle.

458  $n = 5$  animals per group. \*\*\* $p < 0.001$ , \*\* $p < 0.01$ , \* $p < 0.05$ , and n.s., not significant (two-  
459 way ANOVA for F, one-way ANOVA and Student's  $t$ -test for K).

460 **Figure 5. Mesoscopic NE and calcium dynamics in dorsal cortex of awake mice.**

461 (A) (Top) Schematic diagram depicting the strategy for generating CaMKII $\alpha$ ::NECa mice  
462 by crossing dual-NECa mice with CaMKII $\alpha$ -Cre mice to drive the expression of GRAB<sub>NE2m</sub>  
463 and jRGECO1a in excitatory neurons. (Bottom) One-photon excitation and emission  
464 spectra of GRAB<sub>NE2m</sub> (in the absence and presence of ligand) and jRGECO1a<sup>22</sup> (replotted  
465 from FPbase<sup>35</sup>); the three excitation lasers used for mesoscopic imaging are also indicated.

466 (B) Schematic diagram depicting the dual-color mesoscopic imaging setup for recording  
467 GRAB<sub>NE2m</sub> and jRGECO1a fluorescence in behaving mice. Excitation light alternated  
468 between green and red fluorescence imaging, and artifacts were corrected using 405-nm  
469 excitation.

470 (C) Green and red fluorescence was measured using mesoscopic imaging through a 6 mm  
471 x 8 mm cranial window in CaMKII $\alpha$ -Cre::NECa mice, with stimulation by a 1-s pulse of  
472 white noise. Shown below is an example image of GRAB<sub>NE2m</sub> fluorescence.

473 (D) Time course of the change in fluorescence intensity (top) and peak responses (bottom)  
474 measured in CaMKII $\alpha$ ::NECa mice and WT mice expressing the NE-insensitive GRAB<sub>NEmut</sub>  
475 sensor (via virus injection at P0-P1; see Methods) before and immediately following audio  
476 stimulation. Peak response maps from individual mouse and averaged response map were  
477 shown. n = 3 animals per group.

478 (E-F) Schematic illustration (left) of whisker stimulation delivered to CaMKII $\alpha$ ::NECa and  
479 GFAP::NECa mice co-expressing both jRGECO1a and GRAB<sub>NE2m</sub> in excitatory neurons  
480 and astrocytes, respectively. Whisker stimuli were applied unilaterally to either the right  
481 (top row) or left (bottom row) side, and peak response images, representative traces, and  
482 the summary of relative peak  $\Delta F/F_0$  measured in CaMKII $\alpha$ ::NECa (middle) and  
483 GFAP::NECa (right) mice are shown. The black and grey lines in the schematic illustration  
484 (left) indicate the ROIs used to analyze the representative traces and peak responses.  
485 Shown in (F) is the cross-correlation and time lag between the calcium and NE signals  
486 measured in response to bilateral whisker stimulation. The n = 5 animals per group.

487 (G-H) Representative dual-color mesoscopic images (1, top) and traces (1, bottom) of  
488 GRAB<sub>NE2m</sub> and jRGECO1a fluorescence measured in CaMKII $\alpha$ ::NECa (G) and  
489 GFAP::NECa (H) mice before, during, and after locomotion. Individual, averaged peak  
490 responses, and heatmaps of various cortical regions over time are shown for the  
491 GRAB<sub>NE2m</sub> (2) and jRGECO1a (3) signals. The dashed white lines in (1) indicate the ROIs  
492 used to analyze the representative traces. n = 4 animals per group.

493 (I) Cortex-wide Spearman coefficient measured between the NE and calcium signals in the  
494 CaMKII $\alpha$ ::NECa and GFAP::NECa mice (left two images) and between the  
495 CaMKII $\alpha$ ::NECa and GFAP::NECa mice for NE and calcium (right two images).

496 (J) Cross-correlation and time lag between the NE and calcium signals and the onset of

497 locomotion measured in CaMKII $\alpha$ ::NECa (top) and GFAP::NECa (bottom) mice.

498 \*\* $p < 0.01$ , \* $p < 0.05$  and n.s., not significant (Student's  $t$ -test). See also Figures S2 and

499 S3.

500 **STAR Methods**

501 **EXPERIMENTAL MODEL AND SUBJECT DETAILS**

502 **Cell lines**

503 HEK293T cells (cat. no. CRL-3216) were obtained from ATCC, cultured, and verified by  
504 their morphology and growth curve. The HTLA cells used in the Tango assay stably express  
505 a tTA-dependent luciferase reporter and a  $\beta$ -arrestin2-TEV fusion gene, and were  
506 generously provided by Bryan L. Roth<sup>36</sup>. All cell lines were cultured at 37°C in DMEM  
507 (Gibco) supplemented with 10% fetal bovine serum (Gibco) and 1% penicillin-streptomycin  
508 (Gibco) in humidified air containing 5% CO<sub>2</sub>.

509 **Primary cell cultures**

510 Postnatal day 0 (P0) Sprague-Dawley rat pups of both sexes, randomly selected from  
511 Beijing Vital River, were used to isolate cortical neurons. In brief, the brains were removed,  
512 the cortex dissected, neurons were dissociated in 0.25% Trypsin-EDTA (Gibco) was used  
513 to dissociate the neurons. The cells were subsequently plated on 12-mm glass coverslips  
514 coated with poly-D-lysine (Sigma-Aldrich) and cultured at 37°C in neurobasal medium  
515 (Gibco) supplemented with 2% B-27, 1% GlutaMax, and 1% penicillin-streptomycin (Gibco)  
516 in humidified air containing 5% CO<sub>2</sub>.

517 **Mice/rats**

518 All animal experiments were performed in accordance with the US National Institutes of  
519 Health guidelines for the care and use of laboratory animals, and were approved by the  
520 respective Animal Care and Use Committees at Peking University, New York University,  
521 and the US National Institute of Environmental Health Sciences. All animals were housed  
522 in pairs or as families in a temperature-controlled room with a 12-hour light-dark cycle  
523 (lights on from 10 am to 10 pm) with *ad libitum* access to food and water. The *in vivo*  
524 experiments were performed on adult (2-12 months of age) mice of both sexes.

525 TH-Cre mice (MMRRC\_031029-UCD) were obtained from MMRRC. Dual-NECa  
526 transgenic mice were generated with help of Biocytogen Pharmaceuticals Co., Ltd. (Beijing,  
527 China) as follows. We designed and developed a floxed transgenic mouse line (dual-NECa,  
528 EGE-XWY-076) expressing GRAB<sub>NE2m</sub>-iP2A-jRGECO1a by targeting the *Rosa26* locus<sup>30</sup>.  
529 We first constructed a targeting vector containing the CAG promoter followed by the  
530 GRAB<sub>NE2m</sub> and jRGECO1a coding sequences, separated by an improved P2A self-  
531 cleaving peptide<sup>37</sup> to allow for independent expression of the two proteins. We then used  
532 CRISPR/Cas9-mediated homology-directed repair (HDR) to insert the targeting vector into  
533 the *Rosa26* locus of mouse embryonic stem cells. Successful targeting was confirmed via  
534 PCR-based screening and sequencing of the targeted genomic region. Next, the  
535 genetically modified embryonic stem cells were injected into eight-cell stage embryos to  
536 generate chimeric mice. The chimeric mice were then mated with wild-type mice to obtain

537 germline transmission of the targeted allele. The resulting dual-NECa transgenic mouse  
538 line stably expressed both the green fluorescent GRAB<sub>NE2m</sub> sensor and the red calcium  
539 indicator jRGECO1a under the control of the CAG promoter at the *Rosa26* locus upon  
540 excision of the floxed stop codon by Cre recombinase. CaMKII $\alpha$ -Cre (005359; JAX) and  
541 GFAP-Cre (024098; JAX) were used in this study to further drive the expression of  
542 GRAB<sub>NE2m</sub> and jRGECO1a.

## 543 **METHOD DETAILS**

### 544 **Molecular cloning**

545 In this study, the molecular clones were generated using Gibson assembly. The DNA  
546 fragments were amplified with primers containing 25--30-bp overlap, and the cloning  
547 enzymes included T5-exonuclease, Phusion DNA polymerase, and Taq ligase. Sanger  
548 sequencing was used to confirm the sequence of all clones. The pDisplay vector with an  
549 upstream IgK leader sequence upstream and a downstream IRES-mCherry-CAAX  
550 cassette was used to clone all cDNAs encoding the GRAB<sub>NE</sub> sensors, providing cell  
551 membrane targeting and labeling. For sensor optimization, amino acids were randomly  
552 mutated using PCR amplification with NNB codons at the target sites. The pAAV vector  
553 containing the human *Synapsin* promoter was used to clone express the GRAB<sub>NE</sub> sensors  
554 or GRAB<sub>NEmut</sub> in neurons. For luciferase complementation assay, the GRAB<sub>NE</sub>-SmBit and  
555 a2AR-SmBit constructs were modified from  $\beta$ 2AR-SmBit, and the LgBit-mGsi was a gift  
556 from Nevin A. Lambert.

### 557 **Expression of GRAB<sub>NE</sub> sensors in cultured cells and *in vivo***

558 GRAB<sub>NE</sub> sensors were expressed in HEK293T cells and cultured rat cortical neurons as  
559 previously reported<sup>21</sup>.

560 For *in vivo* virus-mediated expression, adult mice were anesthetized with either an i.p.  
561 injection of 2,2,2-tribromoethanol (Avertin, 500 mg/kg body weight, Sigma-Aldrich) or 1.5%  
562 isoflurane by inhalation, 2% lidocaine hydrochloride was injected subcutaneously under  
563 the scalp. the mice were then placed in a stereotaxic frame (RWD Life Science). Small  
564 craniotomy holes were prepared in the skull for virus injection.

565 In Figure 2, AAVs expressing hSyn-GRAB<sub>NE2m/NE2h</sub> and Ef1a-DIO-C1V1-YFP<sup>38</sup> (Vigene,  
566 1x10<sup>13</sup> titer genomic copies per ml) were injected into the LC (AP: -5.45 mm relative to  
567 Bregma; ML:  $\pm$  1.25 mm relative to Bregma; DV: 2.25 mm below the dura) of TH-Cre mice  
568 at a rate of 100 nl/min and in a volume of 500 nl. Four weeks after virus injection, we  
569 implanted multi-mode optical fiber probes (105/125  $\mu$ m core/cladding) into the LC (AP: -  
570 5.45 mm relative to Bregma; ML:  $\pm$  0.85 mm relative to Bregma; DV: 3.5 mm below the  
571 dura).

572 In Figure 3, AAVs expressing GRAB<sub>NE1m</sub>, GRAB<sub>NE2m</sub>, and GRAB<sub>NE2h</sub> (Vigene, 1x10<sup>13</sup> titer  
573 genomic copies per ml) were unilaterally injected into the lateral hypothalamus (AP: -1.7



574 mm relative to Bregma; ML: +0.90 mm relative to Bregma; DV: 6.05 mm below the dura)  
575 of wild-type C57BL/6 mice at a rate of 10 nl/min and in a volume of 100 nl. A 400- $\mu$ m optic  
576 fiber (Thorlabs, BFH48-400) housed in a ceramic ferrule (Thorlabs, SFLC440-10) was  
577 implanted 0.2 mm above the injection site. The experiments were performed three weeks  
578 after virus injection.

579 For the experiments in Figure 4, a fine glass pipette and a micro-syringe pump (Nanoliter  
580 2010 injector, World Precision Instruments) were used to microinject approximately 300 nl  
581 of AAV9-hSyn-NE2m or AAV9-hSyn-Cre virus (Vigene,  $1 \times 10^{13}$  titer genomic copies per ml)  
582 into the mPFC (AP: +1.9 mm relative to Bregma, ML: -0.3 mm relative to Bregma, DV: 1.9  
583 mm below the dura) and/or POA (AP: 0 mm relative to Bregma, ML: -0.6 mm relative to  
584 Bregma, DV: 4.9mm below the dura) at a rate of 30 nl/min.

585 For experiments in Figure 5, we crossed homozygous of the floxed dual-NECa transgenic  
586 mice with CaMKII $\alpha$ -Cre (005359; JAX) or GFAP-Cre (024098; JAX) to obtain  
587 CaMKII $\alpha$ ::NECa and GFAP::NECa offspring, respectively. To achieve widespread  
588 expression of GRAB<sub>NEmut</sub> through the entire cortex, we utilized a method previously  
589 described<sup>39</sup> in which 4  $\mu$ l of AAV9-hSyn-NEmut virus (Vigene,  $1 \times 10^{13}$  titer genomic copies  
590 per ml) was bilaterally injected into the transverse sinus of P0-P1 C57BL/6 mouse pups at  
591 a rate of 1.2  $\mu$ l/min.

#### 592 **Fluorescence imaging of HEK293T cells and cultured neurons.**

593 To visualize cells expressing GRAB<sub>NE</sub> sensors, we used either an inverted Ti-E A1 confocal  
594 microscope (Nikon) equipped with a 10x/0.45 NA (numerical aperture) objective, a  
595 20x/0.75 NA objective, a 40x/1.35 NA oil-immersion objective, a 488-nm laser, and a 561-  
596 nm laser or an Opera Phenix high-content screening system (PerkinElmer) equipped with  
597 a 20x/0.4 NA objective, a 40x/1.1 NA water-immersion objective, a 488-nm laser, and a  
598 561-nm laser. For confocal microscopy, the GFP signal was collected using a 525/50-nm  
599 emission filter combined with the 488-nm laser, while the RFP signal was collected using  
600 a 595/50-nm emission filter combined with the 561-nm laser. For the Opera Phenix system,  
601 the GFP and RFP signals were collected using a 525/50-nm and 600/30-nm emission filter,  
602 respectively. To calibrate the fluorescence signal produced by the green fluorescent  
603 GRAB<sub>NE</sub> sensors, we used the GFP/RFP ratio. The dose-dependent response and on and  
604 off kinetics were determined as previously described<sup>21</sup>.

#### 605 **Measurements of spectra**

606 HEK293T cells expressing GRAB<sub>NE2m</sub> or GRAB<sub>NE2h</sub> were harvested and transferred to a  
607 384-well plate. Excitation and emission spectra were measured at 5-nm increments with a  
608 20-nm bandwidth using a Safire2 multi-mode plate reader (TECAN) in the presence or  
609 absence of 10  $\mu$ M NE. Control cells not expressing a sensor were used to obtain  
610 background fluorescence for subtraction.

#### 611 **Tango assay**

612 HTLA cells expressing the wild-type  $\alpha 2AR$ , GRAB<sub>NE2m</sub>, or GRAB<sub>NE2h</sub> were exposed to  
613 varying concentrations of NE (ranging from 0.1 nM to 10  $\mu$ M) and cultured for 12 hours to  
614 allow luciferase gene expression. Luminescence was then measured using a VICTOR X5  
615 multilabel plate reader (PerkinElmer) after adding Furimazine (NanoLuc Luciferase Assay,  
616 Promega) to a final concentration of 5 mM.

#### 617 **Luciferase complementation assay**

618 The luciferase complementation assay was performed as described previously<sup>40</sup>. Forty-  
619 eight hours after transfection, the cells were washed with phosphate-buffered saline and  
620 transferred to opaque 96-well plates containing diluted NE solutions ranging from 1 nM to  
621 100  $\mu$ M. Luminescence was measured using Nluc after adding Furimazine (NanoLuc  
622 Luciferase Assay, Promega) to each well.

#### 623 **Fiber photometry recordings in freely moving mice during optical stimulation**

624 In Figure 2, fiber photometry recording in the LC was performed using a 473-nm laser,  
625 which produced an output power of 25  $\mu$ W at the end of the fiber. The resulting emission  
626 spectra were analyzed using a linear unmixing algorithm  
627 (<https://www.niehs.nih.gov/research/atniehs/labs/ln/pi/iv/tools/index.cfm>). The coefficients  
628 from the unmixing algorithm represent the fluorescence intensities of various  
629 fluorophores<sup>23</sup>. To evoke C1V1-mediated NE release, pulse trains (10-ms pulses at 20 Hz  
630 for 1 s) were delivered to the LC using a 561-nm laser with an output power of 9.9 mW at  
631 the end of the fiber.

#### 632 **Fiber photometry recordings in mice during behavioral testing**

633 For the fiber photometry recordings in Figure 3, GRAB<sub>NE</sub> sensors were excited using a  
634 400-Hz sinusoidal blue LED light (30 mW; M470F1 driven by an LEDD1B driver; both from  
635 Thorlabs), which was bandpass filtered (passing band: 472  $\pm$  15 nm, Semrock, FF02-  
636 472/30-25) and transmitted to the brain. The emission light traveled back through the same  
637 optic fiber, through a bandpass filter (passing band: 534  $\pm$  25 nm, Semrock, FF01-535/50),  
638 and was recorded using a Femtowatt Silicon Photoreceiver connected to an RZ5 real-time  
639 processor (Tucker-Davis Technologies). A custom-written program was used to extract the  
640 400-Hz signals in real-time and determine the intensity of the GRAB<sub>NE</sub> fluorescence signal.

641 All behavioral tests were performed at least 1 hour after the onset of the dark cycle. For  
642 the tail suspension test, each mouse was lifted gently off the bottom of its cage six times  
643 for 60 seconds each, with a minimum of 1 min between each lift. In the forced swimming  
644 test, the mouse was gently placed in a 1000-ml conical flask filled with lukewarm water and  
645 then removed after 4-6 min. the mouse was then gently dried with paper towels and placed  
646 on a heating pad inside its home cage. No aggressive behavior was observed during the  
647 test. All videos were recorded at 25 frames per second and manually annotated frame-by-  
648 frame using a custom MATLAB program (MathWorks)<sup>41</sup>.

649 **Fiber photometry recordings and polysomnographic recordings during the sleep-**  
650 **wake cycle**

651 To measure the fluorescence signals in Figure 4, a 200- $\mu$ m optical fiber cannula (Fiber  
652 core: 200  $\mu$ m; numerical aperture: 0.37; Inper, Zhejiang, China) was implanted 0.1 mm  
653 above the virus injection site and fixed to the skull using dental cement.

654 To monitor the animal's sleep-wake state, EEG electrodes were implanted into the  
655 craniotomy holes above the frontal cortex and visual cortex, and EMG wires were placed  
656 in the trapezius muscles on both sides. The electrodes were connected to a  
657 microconnector and fixed to the skull using dental cement. The microconnector was  
658 connected via a flexible cable and attached to an electric slip ring, allowing the mouse to  
659 move freely. The cortical EEG and neck EMG signals were amplified (NL104A, Digitimer),  
660 filtered (NL125/6, Digitimer), digitized using a Power1401 digitizer (Cambridge Electronic  
661 Design Ltd.), and recorded using Spike2 software (Cambridge Electronic Design Ltd.) at a  
662 sampling rate of 1000 Hz.

663 A fiber photometry system (Thinker Tech, Nanjing, China) was used to record the  
664 fluorescence signals in freely moving mice. Blue (473-nm) and yellow (580-nm) LED lights  
665 (Cree LED) were bandpass filtered (470/25 nm, model 65-144 and 572/28 nm, model  
666 84100, Edmund Optics), reflected by a 495-nm long-pass dichroic mirror (model 67-069,  
667 Edmund Optics) and a multi-band filter (model 87-282, Edmund Optics) dichroic mirror,  
668 and then focused using a 20x objective lens (Olympus). An optical fiber guided the light  
669 between the commutator and the implanted optical fiber cannula. The excitation light power  
670 at the tip of the optical fiber was adjusted to 20-30  $\mu$ W in order to minimize photobleaching  
671 and was delivered at 100 Hz with a 5-ms pulse duration. Green fluorescence was bandpass  
672 filtered (525/39 nm, model MF525-39, Thorlabs), red fluorescence was bandpass filtered  
673 (615/20 nm, model 87753, Edmund Optics), and the resulting emissions were collected  
674 using a photomultiplier tube (model H10721-210, Hamamatsu). The current output from  
675 the photomultiplier tube was converted to a voltage signal using an amplifier (model C7319,  
676 Hamamatsu) and passed through a low-pass filter. The analog voltage signals were then  
677 digitized using an acquisition card (National Instruments). Photometry signals and  
678 polysomnographic recordings were aligned based on a TTL signal. To minimize  
679 autofluorescence of the optical fiber, the recording fiber was photobleached using a high-  
680 power LED before recording. Background autofluorescence was subtracted from the  
681 recorded signals during subsequent analysis.

682 **Mesosopic *in vivo* imaging**

683 The surgery to prepare the imaging window and implant the EMG electrodes was  
684 performed on CaMKII $\alpha$ ::NECa, GFAP::NECa, or wild-type mice expressing GRAB<sub>NEmut</sub>.  
685 Anesthesia was induced with an i.p. injection of 2,2,2-tribromoethanol (Avertin, 500 mg per  
686 kg) and maintained with 1% isoflurane. The mouse was then fixed in a stereotaxic frame,  
687 and 2% lidocaine hydrochloride was injected under the scalp. To protect the corneas,

688 erythromycin ophthalmic ointment was applied to both eyes. The scalp and underlying  
689 muscles were carefully removed to expose the skull, and the majority of the skull above  
690 the dorsal cortex was replaced with a custom-made coverslip to create an optical window.  
691 EMG electrodes were implanted as described above, and the mice were given at least 7  
692 days to recover, followed by an additional 3 days to habituate to the head fixation before  
693 imaging.

694 Mesoscopic imaging was performed using a customized dual-color macroscope equipped  
695 with a 2x/0.5 NA objective lens (Olympus, MVPLAPO2XC), two 1x/0.25 NA tube lenses  
696 (Olympus, MVPLAPO1X), and two sCMOS cameras (Andor, Zyla 4.2 Plus, 2,048×2,048  
697 pixels, 16-bit). A multi-line fiber-coupled laser system (Changchun New Industries  
698 Optoelectronics Tech. Co., Ltd., RGB-405/488/561/642nm-220mW-CC32594) generated  
699 three excitation wavelengths (405 nm, 488 nm, and 561 nm). Emission light was passed  
700 through a long-pass dichroic mirror (Thorlabs, DMLP567L) and either a 525/36-nm or  
701 609/34-nm emission filter (Chroma) and captured by the sCMOS cameras. Both the  
702 excitation laser and the camera exposure were triggered by an Arduino board (Uno) using  
703 custom-written programs. Dual-color imaging was performed using alternating illumination  
704 between the 405-nm laser and the 488-nm or/and 561-nm laser. Images were acquired  
705 using Micro-Manager 2.0 at 512×512-pixel resolution at a rate of 5 Hz with 40-ms exposure.

706 During imaging, the mice were head-fixed but could run freely on a linear treadmill. A near-  
707 infrared camera with an infrared LED was used to record the mouse's behavior and pupil  
708 size. For auditory stimulation, 1 sec of 70-dB white noise was generated using a RZ6 Multi  
709 I/O Processor (Tucker-Davis Technologies) and delivered via a magnetic speaker. For  
710 whisker stimulation, a 1-sec pendular stick was delivered to the mouse whisker either  
711 unilaterally or bilaterally. For visual stimulation, 50-ms of a flashing LED light was delivered  
712 to the mouse eye either unilaterally or bilaterally. Locomotion activity was recorded using  
713 the encoder in the treadmill.

#### 714 **Quantification and statistical analysis**

715 For the imaging experiments using cultured HEK293T cells and primary neurons,  
716 fluorescence intensity was first quantified using ImageJ software (National Institutes of  
717 Health) or Harmony software (PerkinElmer, Inc.) for and then analyzed using a custom-  
718 written MATLAB script (MathWorks) or Origin Pro (OriginLab).

719 The photometry data were analyzed using a custom program written in MATLAB. To  
720 calculate  $\Delta F/F_0$ , baseline values were measured during REM sleep with no apparent  
721 fluctuations. To compare the change in fluorescence between animals, the z-score-  
722 transformed  $\Delta F/F_0$  was normalized using the standard deviation of the baseline signals.

723 EEG and EMG recordings were used to determine the animal's sleep-wake state. In brief,  
724 the EEG and EMG data were filtered at 0.5-100 Hz and 30-500 Hz, respectively, and semi-  
725 automatically scored off-line in 4-s epochs of wakefulness, REM sleep, and NREM sleep

726 using AccuSleep (<https://github.com/zekebarger/AccuSleep>)<sup>42</sup>; the defined sleep-wake  
727 states were confirmed by visual examination and corrected if necessary. Wakefulness was  
728 defined as desynchronized low-amplitude EEG activity and high-amplitude EMG activity  
729 with phasic bursts. NREM sleep was defined as synchronized EEG activity with high-  
730 amplitude delta rhythm (0.5-4 Hz) and low EMG activity. REM sleep was defined as a  
731 pronounced theta rhythm (6-10 Hz) and low EMG activity. EEG spectral analysis was  
732 estimated using a short-time fast Fourier transform (FFT).

733 For the mesoscopic imaging data, raw images acquired from each camera were calibrated  
734 to ensure uniformity across the imaging region, and movement-related artifacts were  
735 corrected using the motion-correction algorithm NoRMCorre<sup>43</sup>. The corrected image stack  
736 with a size of 512 × 512 pixels was downsampled by a factor of 0.5 to 256 × 256 pixels for  
737 further analysis. For dual-color imaging, the red-channel images were registered to the  
738 green-channel images by performing an automated transformation using the "similarity"  
739 mode of the MATLAB function "imregtform". The same transformation was then applied to  
740 all red-channel images to align them with their corresponding green-channel images. The  
741 resulting image stack was saved as a binary file to facilitate the input and output of large  
742 files. A mask was created to exclude background and blood vessel pixels from the  
743 corrected image stack using the machine learning-based ImageJ plugin Trainable Weka  
744 Segmentation (v3.3.2); these minimized artifacts caused by blood vessel constriction and  
745 dilation. To correct the effects of hemodynamics on fluorescence<sup>44,45</sup>, we performed a pixel-  
746 by-pixel correction based on a linear regression of the ligand-dependent signals (excited  
747 by 488-nm or 561-nm light) against the ligand-independent signals (excited by 405-nm light)  
748 for both GRAB<sub>NE2m</sub> and jRGECO1a based on their respective spectra.

749 Baseline images were smoothed using a Gaussian filter ( $\sigma=2$ ), and linear regression was  
750 performed for each pixel by regressing the baseline fluorescence intensity of the 405-nm-  
751 excited channel onto the 488-nm or 561-nm signal. The regression coefficient was then  
752 used to rescale the 405-nm channel, which was then subtracted from the 488-nm or 561-  
753 nm signal. The corrected signal was added to the averaged rescaled 405-nm channel  
754 signal to avoid negative values. The response of each pixel was calculated using the  
755 following equation:  $\Delta F/F_0 = (F - F_0)/F_0$ , where  $F_0$  is defined as the average baseline  
756 fluorescence intensity.

757 We registered the mean fluorescence image to a 2D projection of the Allen Common  
758 Coordinate Framework v3 (CCFv3) using four manually identified anatomical landmarks,  
759 including the left, center, and right points in the boundary between the anterior cortex and  
760 the olfactory bulbs, and the medial point at the base of the retrosplenial cortex. To analyze  
761 the time course of the response in a specific brain region, we calculated the average  $\Delta F/F_0$   
762 value for all available pixels within that region. To align and average the responses across  
763 the entire cortex from multiple mice, we developed a custom script to first register the peak  
764 response image for each individual mouse to the Allen CCFv3 and then averaged the  
765 images, preserving only the intersection pixels.

766 **DATA AND SOFTWARE AVAILABILITY**

767 The custom-written MATLAB programs used in this study will be provided upon request to  
768 the corresponding author.



769 **Supplemental figure legends**

770 **Figure S1. Selectivity of next-generation GRAB<sub>NE</sub> sensors (related to Figure 1).**

771 Normalized changes in the fluorescence intensity of GRAB<sub>NE2m</sub> (top) and GRAB<sub>NE2h</sub>  
772 (bottom) in response to application of the indicated molecules (applied at 10  $\mu$ M),  
773 expressed relative to NE. NE, norepinephrine; Epi, epinephrine; ISO, isoprenaline; YO,  
774 yohimbine; ICI, ICI-118,551; ACh, acetylcholine; 5-HT, 5-hydroxytryptamine (serotonin);  
775 Glu, glutamate; GABA,  $\gamma$ -aminobutyric acid; ADO, adenosine; HA, histamine.

776 **Figure S2. GRAB<sub>NE2m</sub> and GRAB<sub>NEmut</sub> fluorescence measure during audio stimulation**  
777 **(related to Figure 5).**

778 (A) Schematic diagram depicting the delivery of AAV in P0-P1 mouse pups by injection into  
779 the transverse sinuses in P0-P1 mouse for expressing GRAB<sub>NEmut</sub> in neurons in the dorsal  
780 cortex. Also shown are an image of GRAB<sub>NEmut</sub> fluorescence and the paradigm used for  
781 audio stimulation using white noise.

782 (B) Representative images and time course of the change in diameter pupil, GRAB<sub>NE2m</sub>  
783 (left) and GRAB<sub>NEmut</sub> (right) fluorescence measured in the cortex, and the EMG recording.  
784 The shaded areas indicate the delivery of white noise.

785 **Figure S3. Mesoscopic NE and calcium dynamics in dorsal cortex of awake mice**  
786 **(related to Figure 5).**

787 (A-C) Illustrations (left) of whisker stimulation and visual stimulation delivered to  
788 CaMKII $\alpha$ ::NECa and GFAP::NECa mice. Shown are the peak response images,  
789 representative traces, and summary of the peak responses following bilateral (A-B) or  
790 unilateral (C) stimulation of the indicated mice. black and grey lines indicate the ROIs used  
791 to analyze the representative traces. n = 3-5 animals per group.

792 \*\* $p < 0.01$ , \* $p < 0.05$ , and n.s., not significant (Paired student's  $t$ -test).

## 793 References

- 794 1. Berridge, C.W., Schmeichel, B.E., and España, R.A. (2012). Noradrenergic modulation of  
795 wakefulness/arousal. *Sleep Medicine Reviews* 16, 187-197.  
796 <https://doi.org/10.1016/j.smrv.2011.12.003>.
- 797 2. Chrousos, G.P. (2009). Stress and disorders of the stress system. *Nature Reviews*  
798 *Endocrinology* 5, 374-381. 10.1038/nrendo.2009.106.
- 799 3. Bast, N., Poustka, L., and Freitag, C.M.J.E.J.o.N. (2018). The locus coeruleus–norepinephrine  
800 system as pacemaker of attention – a developmental mechanism of derailed attentional  
801 function in autism spectrum disorder. 47.
- 802 4. Berridge, C.W., and Waterhouse, B.D. (2003). The locus coeruleus–noradrenergic system:  
803 modulation of behavioral state and state-dependent cognitive processes. *Brain Research*  
804 *Reviews* 42, 33-84. [https://doi.org/10.1016/S0165-0173\(03\)00143-7](https://doi.org/10.1016/S0165-0173(03)00143-7).
- 805 5. Brodde, O.-E., Bruck, H., Leineweber, K., and Seyfarth, T. (2001). Presence, distribution and  
806 physiological function of adrenergic and muscarinic receptor subtypes in the human heart.  
807 *Basic Research in Cardiology* 96, 528-538. 10.1007/s003950170003.
- 808 6. Zimmerman, B.G. (1981). Adrenergic Facilitation by Angiotensin: Does it Serve a  
809 Physiological Function? *Clinical Science* 60, 343-348. 10.1042/cs0600343.
- 810 7. Bito, L., Davson, H., Levin, E., Murray, M., and Snider, N. (1966). THE CONCENTRATIONS  
811 OF FREE AMINO ACIDS AND OTHER ELECTROLYTES IN CEREBROSPINAL FLUID, IN VIVO  
812 DIALYSATE OF BRAIN, AND BLOOD PLASMA OF THE DOG\*. *Journal of Neurochemistry*  
813 13, 1057-1067. 10.1111/j.1471-4159.1966.tb04265.x.
- 814 8. Justice, J.B. (1993). Quantitative microdialysis of neurotransmitters. *Journal of*  
815 *Neuroscience Methods* 48, 263-276. [https://doi.org/10.1016/0165-0270\(93\)90097-B](https://doi.org/10.1016/0165-0270(93)90097-B).
- 816 9. Watson, C.J., Venton, B.J., and Kennedy, R.T. (2006). In Vivo Measurements of  
817 Neurotransmitters by Microdialysis Sampling. *Analytical Chemistry* 78, 1391-1399.  
818 10.1021/ac0693722.
- 819 10. Chefer, V.I., Thompson, A.C., Zapata, A., and Shippenberg, T.S. (2009). Overview of Brain  
820 Microdialysis. *Current Protocols in Neuroscience* 47, 7.1.1-7.1.28.  
821 10.1002/0471142301.ns0701s47.
- 822 11. Lee, G.J., Park, J.H., and Park, H.K. (2008). Microdialysis applications in neuroscience.  
823 *Neurological Research* 30, 661-668. 10.1179/174313208X289570.
- 824 12. Olive, M.F., Mehmert, K.K., and Hodge, C.W. (2000). Microdialysis in the mouse nucleus  
825 accumbens: a method for detection of monoamine and amino acid neurotransmitters  
826 with simultaneous assessment of locomotor activity. *Brain Research Protocols* 5, 16-24.  
827 [https://doi.org/10.1016/S1385-299X\(99\)00054-9](https://doi.org/10.1016/S1385-299X(99)00054-9).
- 828 13. Bruns, D. (2004). Detection of transmitter release with carbon fiber electrodes. *Methods*  
829 33, 312-321. <https://doi.org/10.1016/j.ymeth.2004.01.004>.
- 830 14. Park, J., Kile, B.M., and Mark Wightman, R. (2009). In vivo voltammetric monitoring of  
831 norepinephrine release in the rat ventral bed nucleus of the stria terminalis and  
832 anteroventral thalamic nucleus. *European Journal of Neuroscience* 30, 2121-2133.  
833 10.1111/j.1460-9568.2009.07005.x.
- 834 15. Robinson, D.L., Hermans, A., Seipel, A.T., and Wightman, R.M. (2008). Monitoring Rapid  
835 Chemical Communication in the Brain. *Chemical Reviews* 108, 2554-2584.  
836 10.1021/cr068081q.

- 837 16. Zhou, Z., and Mislser, S. (1995). Amperometric detection of stimulus-induced quantal  
838 release of catecholamines from cultured superior cervical ganglion neurons. *Proceedings*  
839 *of the National Academy of Sciences* *92*, 6938.
- 840 17. Muller, A., Joseph, V., Slesinger, P.A., and Kleinfeld, D. (2014). Cell-based reporters reveal  
841 in vivo dynamics of dopamine and norepinephrine release in murine cortex. *Nature*  
842 *Methods* *11*, 1245. [10.1038/nmeth.3151](https://doi.org/10.1038/nmeth.3151).  
843 <https://www.nature.com/articles/nmeth.3151#supplementary-information>.
- 844 18. Nakanishi, J., Takarada, T., Yunoki, S., Kikuchi, Y., and Maeda, M. (2006). FRET-based  
845 monitoring of conformational change of the  $\beta_2$  adrenergic receptor in living cells.  
846 *Biochemical and Biophysical Research Communications* *343*, 1191-1196.  
847 <https://doi.org/10.1016/j.bbrc.2006.03.064>.
- 848 19. Patriarchi, T., Cho, J.R., Merten, K., Howe, M.W., Marley, A., Xiong, W.-H., Folk, R.W.,  
849 Broussard, G.J., Liang, R., Jang, M.J., et al. (2018). Ultrafast neuronal imaging of dopamine  
850 dynamics with designed genetically encoded sensors. *Science* *360*.
- 851 20. Vilardaga, J.-P., Bünemann, M., Krasel, C., Castro, M., and Lohse, M.J. (2003). Measurement  
852 of the millisecond activation switch of G protein-coupled receptors in living cells. *Nature*  
853 *Biotechnology* *21*, 807. [10.1038/nbt838](https://doi.org/10.1038/nbt838).  
854 <https://www.nature.com/articles/nbt838#supplementary-information>.
- 855 21. Feng, J., Zhang, C., Lischinsky, J.E., Jing, M., Zhou, J., Wang, H., Zhang, Y., Dong, A., Wu, Z.,  
856 Wu, H., et al. (2019). A Genetically Encoded Fluorescent Sensor for Rapid and Specific In  
857 Vivo Detection of Norepinephrine. *Neuron* *102*, 745-761 e748.  
858 [10.1016/j.neuron.2019.02.037](https://doi.org/10.1016/j.neuron.2019.02.037).
- 859 22. Dana, H., Mohar, B., Sun, Y., Narayan, S., Gordus, A., Hasseman, J.P., Tsegaye, G., Holt, G.T.,  
860 Hu, A., Walpita, D., et al. (2016). Sensitive red protein calcium indicators for imaging neural  
861 activity. *Elife* *5*. [10.7554/eLife.12727](https://doi.org/10.7554/eLife.12727).
- 862 23. Meng, C., Zhou, J., Papaneri, A., Peddada, T., Xu, K., and Cui, G. (2018). Spectrally Resolved  
863 Fiber Photometry for Multi-component Analysis of Brain Circuits. *Neuron* *98*, 707-  
864 717.e704. [10.1016/j.neuron.2018.04.012](https://doi.org/10.1016/j.neuron.2018.04.012).
- 865 24. Kjaerby, C., Andersen, M., Hauglund, N., Untiet, V., Dall, C., Sigurdsson, B., Ding, F., Feng,  
866 J., Li, Y., Weikop, P., et al. (2022). Memory-enhancing properties of sleep depend on the  
867 oscillatory amplitude of norepinephrine. *Nat Neurosci* *25*, 1059-1070. [10.1038/s41593-  
868 022-01102-9](https://doi.org/10.1038/s41593-022-01102-9).
- 869 25. Osorio-Forero, A., Cardis, R., Vantomme, G., Guillaume-Gentil, A., Katsioudi, G.,  
870 Devenoges, C., Fernandez, L.M.J., and Luthi, A. (2021). Noradrenergic circuit control of  
871 non-REM sleep substates. *Curr Biol* *31*, 5009-5023 e5007. [10.1016/j.cub.2021.09.041](https://doi.org/10.1016/j.cub.2021.09.041).
- 872 26. Dong, H., Li, M., Yan, Y., Qian, T., Lin, Y., Ma, X., Vischer, H.F., Liu, C., Li, G., Wang, H., et al.  
873 (2023). Genetically encoded sensors for measuring histamine release both  
874 *in vitro* and *in vivo*. *Neuron*.  
875 [10.1016/j.neuron.2023.02.024](https://doi.org/10.1016/j.neuron.2023.02.024).
- 876 27. Dana, H., Mohar, B., Sun, Y., Narayan, S., Gordus, A., Hasseman, J.P., Tsegaye, G., Holt, G.T.,  
877 Hu, A., Walpita, D., et al. (2016). Sensitive red protein calcium indicators for imaging neural  
878 activity. *eLife* *5*, e12727. [10.7554/eLife.12727](https://doi.org/10.7554/eLife.12727).
- 879 28. Madisen, L., Zwingman, T.A., Sunkin, S.M., Oh, S.W., Zariwala, H.A., Gu, H., Ng, L.L., Palmiter,  
880 R.D., Hawrylycz, M.J., Jones, A.R., et al. (2010). A robust and high-throughput Cre

- 881 reporting and characterization system for the whole mouse brain. *Nat Neurosci* *13*, 133-  
882 140. [10.1038/nn.2467](https://doi.org/10.1038/nn.2467).
- 883 29. Muzumdar, M.D., Tasic, B., Miyamichi, K., Li, L., and Luo, L. (2007). A global double-  
884 fluorescent Cre reporter mouse. *genesis* *45*, 593-605. <https://doi.org/10.1002/dvg.20335>.
- 885 30. Madisen, L., Garner, A.R., Shimaoka, D., Chuong, A.S., Klapoetke, N.C., Li, L., van der Bourg,  
886 A., Niino, Y., Egolf, L., Monetti, C., et al. (2015). Transgenic mice for intersectional targeting  
887 of neural sensors and effectors with high specificity and performance. *Neuron* *85*, 942-  
888 958. [10.1016/j.neuron.2015.02.022](https://doi.org/10.1016/j.neuron.2015.02.022).
- 889 31. Schwarz, L.A., and Luo, L. (2015). Organization of the Locus Coeruleus-Norepinephrine  
890 System. *Current Biology* *25*, R1051-R1056. [10.1016/j.cub.2015.09.039](https://doi.org/10.1016/j.cub.2015.09.039).
- 891 32. Schwarz, L.A., Miyamichi, K., Gao, X.J., Beier, K.T., Weissbourd, B., DeLoach, K.E., Ren, J.,  
892 Ibanes, S., Malenka, R.C., Kremer, E.J., and Luo, L. (2015). Viral-genetic tracing of the input-  
893 output organization of a central noradrenaline circuit. *Nature* *524*, 88-92.  
894 [10.1038/nature14600](https://doi.org/10.1038/nature14600).
- 895 33. Lohani, S., Moberly, A.H., Benisty, H., Landa, B., Jing, M., Li, Y., Higley, M.J., and Cardin, J.A.  
896 (2022). Spatiotemporally heterogeneous coordination of cholinergic and neocortical  
897 activity. *Nat Neurosci* *25*, 1706-1713. [10.1038/s41593-022-01202-6](https://doi.org/10.1038/s41593-022-01202-6).
- 898 34. Kuan, L., Li, Y., Lau, C., Feng, D., Bernard, A., Sunkin, S.M., Zeng, H., Dang, C., Hawrylycz,  
899 M., and Ng, L. (2015). Neuroinformatics of the Allen Mouse Brain Connectivity Atlas.  
900 *Methods* *73*, 4-17. <https://doi.org/10.1016/j.ymeth.2014.12.013>.
- 901 35. Lambert, T.J. (2019). FPbase: a community-editable fluorescent protein database. *Nature*  
902 *Methods* *16*, 277-278. [10.1038/s41592-019-0352-8](https://doi.org/10.1038/s41592-019-0352-8).
- 903 36. Kroeze, W.K., Sassano, M.F., Huang, X.-P., Lansu, K., McCorvy, J.D., Giguère, P.M., Sciaky,  
904 N., and Roth, B.L. (2015). PRESTO-Tango as an open-source resource for interrogation of  
905 the druggable human GPCRome. *Nature Structural & Molecular Biology* *22*, 362.  
906 [10.1038/nsmb.3014](https://doi.org/10.1038/nsmb.3014). [https://www.nature.com/articles/nsmb.3014#supplementary-  
907 information](https://www.nature.com/articles/nsmb.3014#supplementary-information).
- 908 37. Lo, C.-A., Kays, I., Emran, F., Lin, T.-J., Cvetkovska, V., and Chen, Brian E. (2015).  
909 Quantification of Protein Levels in Single Living Cells. *Cell Reports* *13*, 2634-2644.  
910 <https://doi.org/10.1016/j.celrep.2015.11.048>.
- 911 38. Yizhar, O., Fenno, Lief E., Davidson, Thomas J., Mogri, M., and Deisseroth, K. (2011).  
912 Optogenetics in Neural Systems. *Neuron* *71*, 9-34. [10.1016/j.neuron.2011.06.004](https://doi.org/10.1016/j.neuron.2011.06.004).
- 913 39. Hamodi, A.S., Martinez Sabino, A., Fitzgerald, N.D., Moschou, D., and Crair, M.C. (2020).  
914 Transverse sinus injections drive robust whole-brain expression of transgenes. *eLife* *9*,  
915 e53639. [10.7554/eLife.53639](https://doi.org/10.7554/eLife.53639).
- 916 40. Wan, Q., Okashah, N., Inoue, A., Nehmé, R., Carpenter, B., Tate, C.G., and Lambert, N.A.  
917 (2018). Mini G protein probes for active G protein-coupled receptors (GPCRs) in live cells.  
918 *Journal of Biological Chemistry*.
- 919 41. Lin, D., Boyle, M.P., Dollar, P., Lee, H., Lein, E.S., Perona, P., and Anderson, D.J. (2011).  
920 Functional identification of an aggression locus in the mouse hypothalamus. *Nature* *470*,  
921 221. [10.1038/nature09736](https://doi.org/10.1038/nature09736).  
922 <https://www.nature.com/articles/nature09736#supplementary-information>.
- 923 42. Barger, Z., Frye, C.G., Liu, D., Dan, Y., and Bouchard, K.E. (2019). Robust, automated sleep  
924 scoring by a compact neural network with distributional shift correction. *PLOS ONE* *14*,

- 925 e0224642. 10.1371/journal.pone.0224642.
- 926 43. Xu, M., Chung, S., Zhang, S., Zhong, P., Ma, C., Chang, W.-C., Weissbourd, B., Sakai, N.,  
927 Luo, L., Nishino, S., and Dan, Y. (2015). Basal forebrain circuit for sleep-wake control. *Nat*  
928 *Neurosci* *18*, 1641-1647. 10.1038/nn.4143.
- 929 44. Ma, Y., Shaik, M.A., Kim, S.H., Kozberg, M.G., Thibodeaux, D.N., Zhao, H.T., Yu, H., and  
930 Hillman, E.M.C. (2016). Wide-field optical mapping of neural activity and brain  
931 haemodynamics: considerations and novel approaches. *Philos Trans R Soc Lond B Biol Sci*  
932 *371*, 20150360. 10.1098/rstb.2015.0360.
- 933 45. Valley, M.T., Moore, M.G., Zhuang, J., Mesa, N., Castelli, D., Sullivan, D., Reimers, M., and  
934 Waters, J. (2019). Separation of hemodynamic signals from GCaMP fluorescence  
935 measured with wide-field imaging. *J Neurophysiol* *123*, 356-366. 10.1152/jn.00304.2019.
- 936



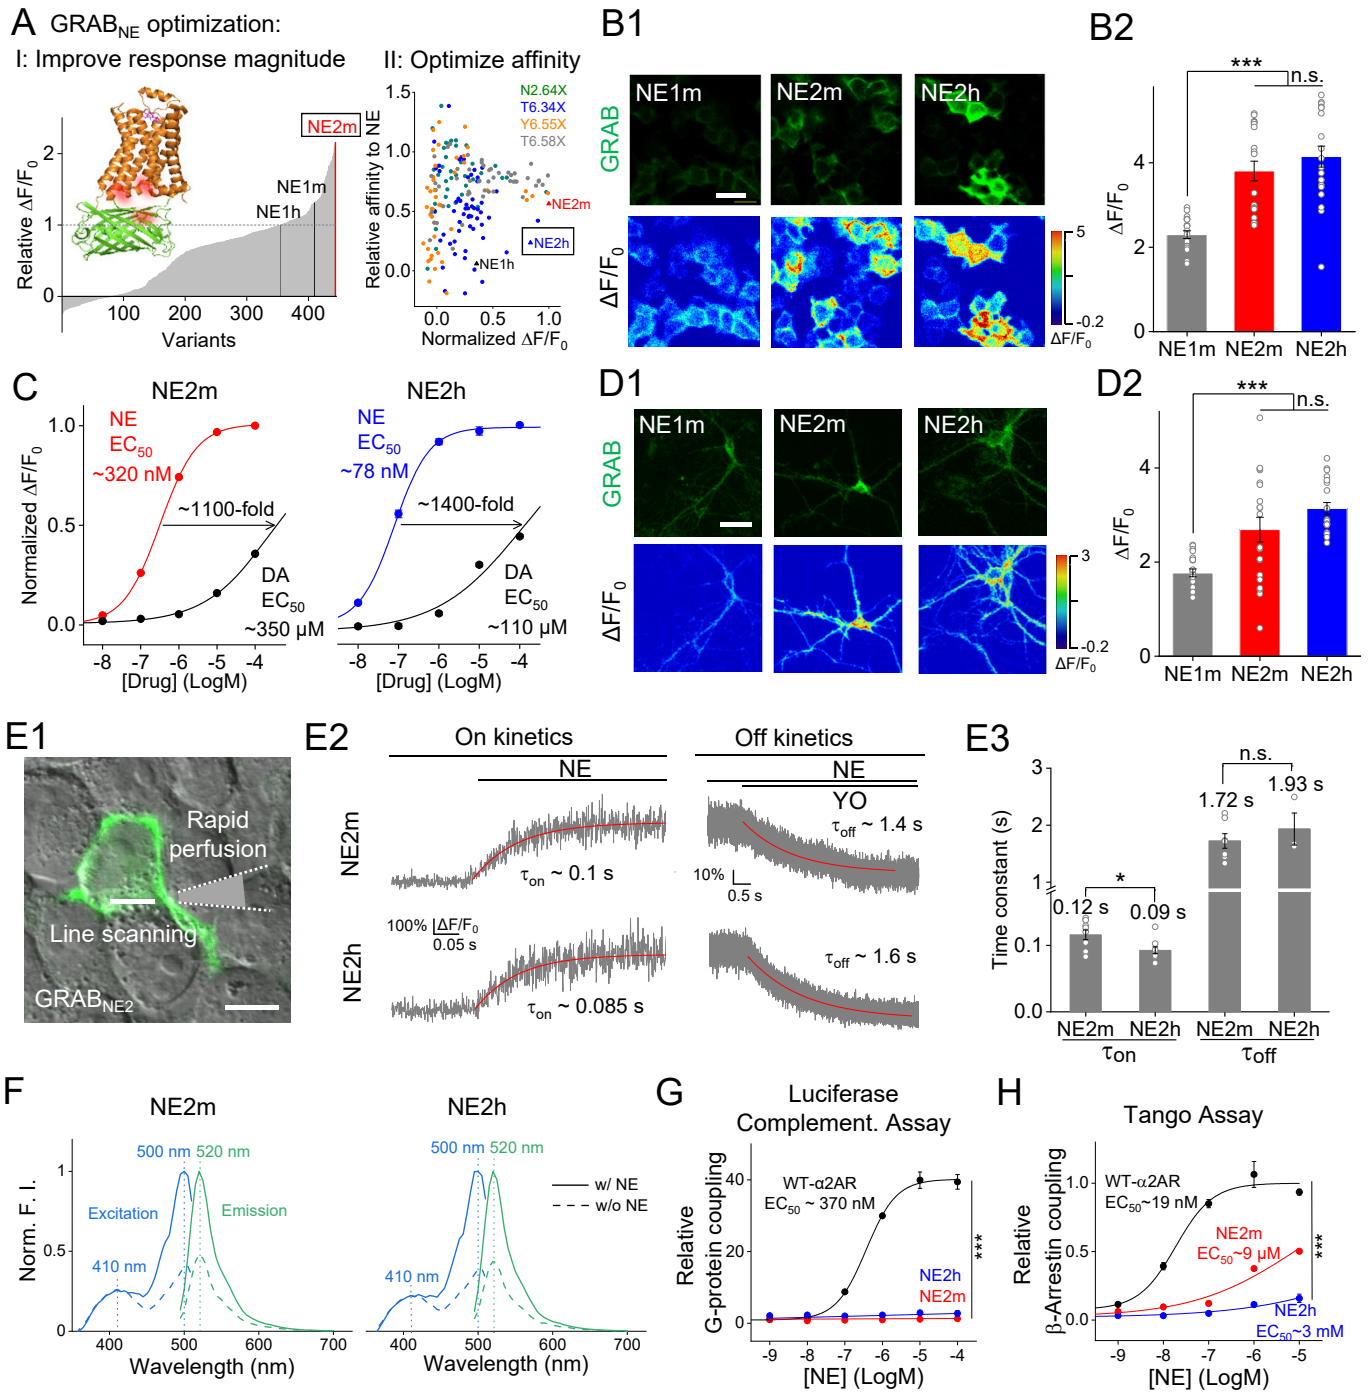

**Figure 1. Optimization and *in vitro* characterization of next-generation GRAB<sub>NE</sub> sensors.**

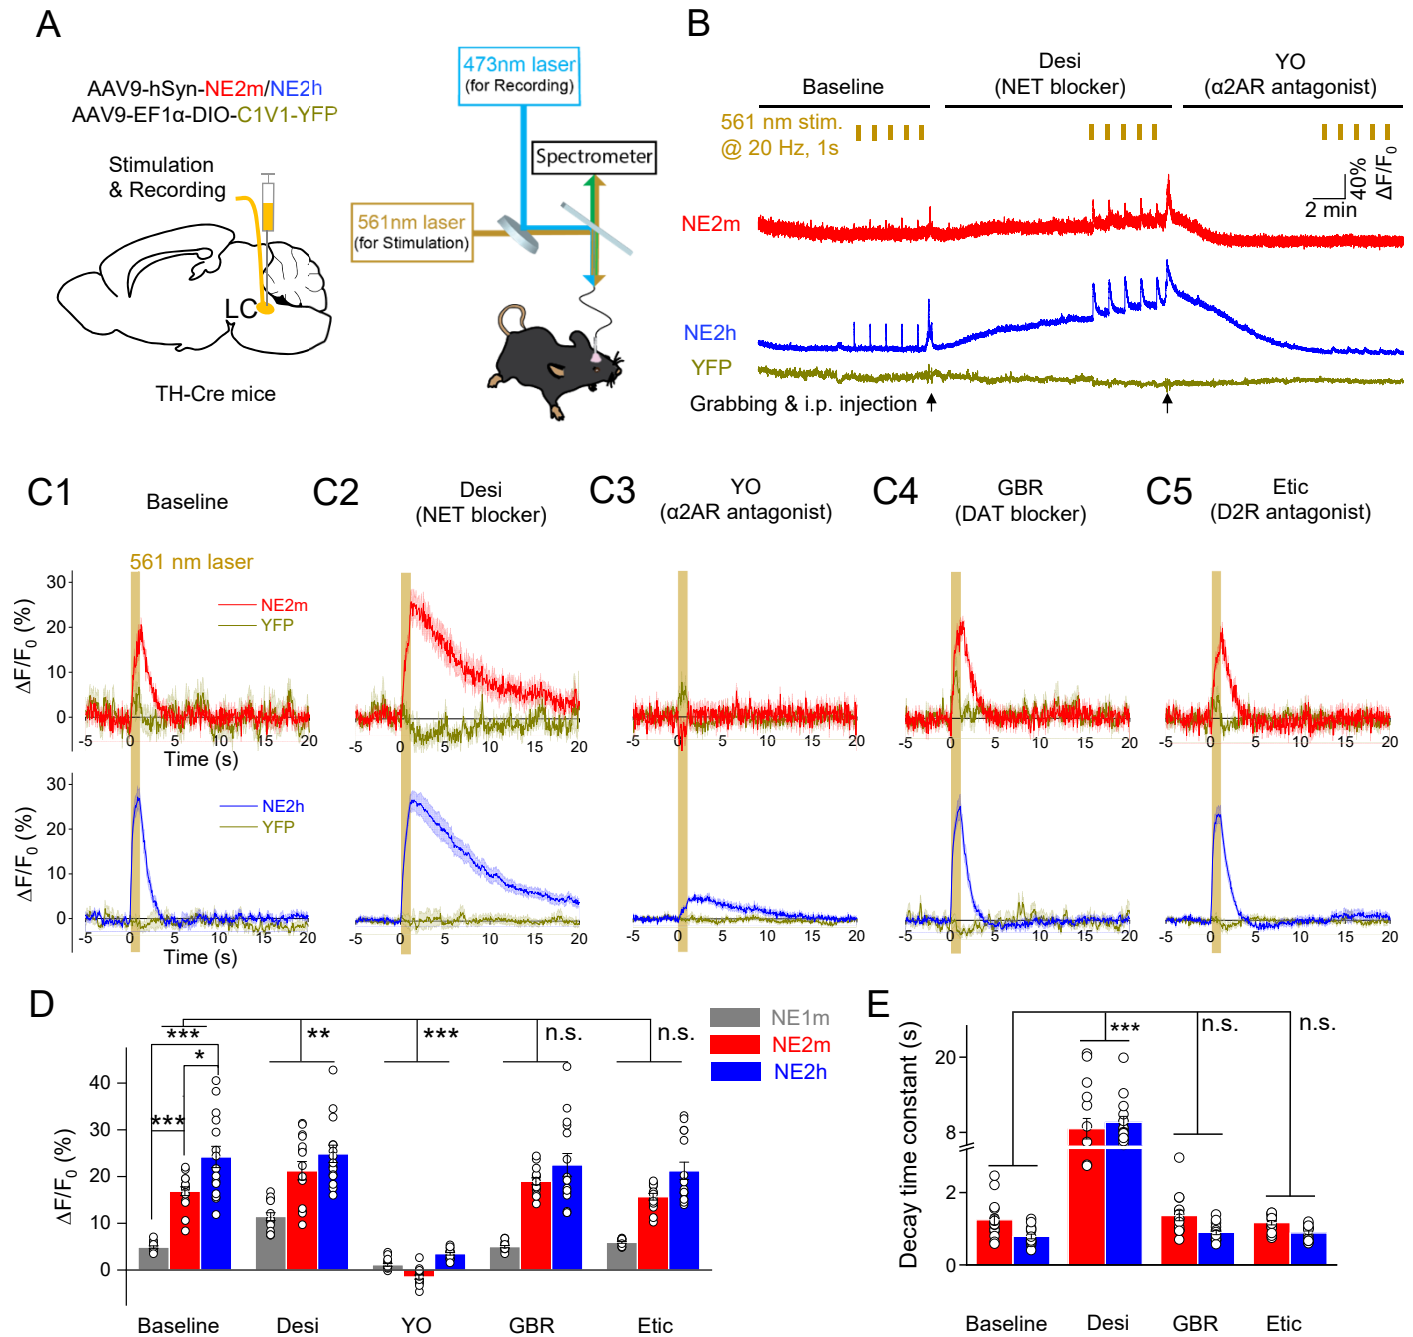

**Figure 2. Detection of optogenetically evoked NE release in freely moving mice.**

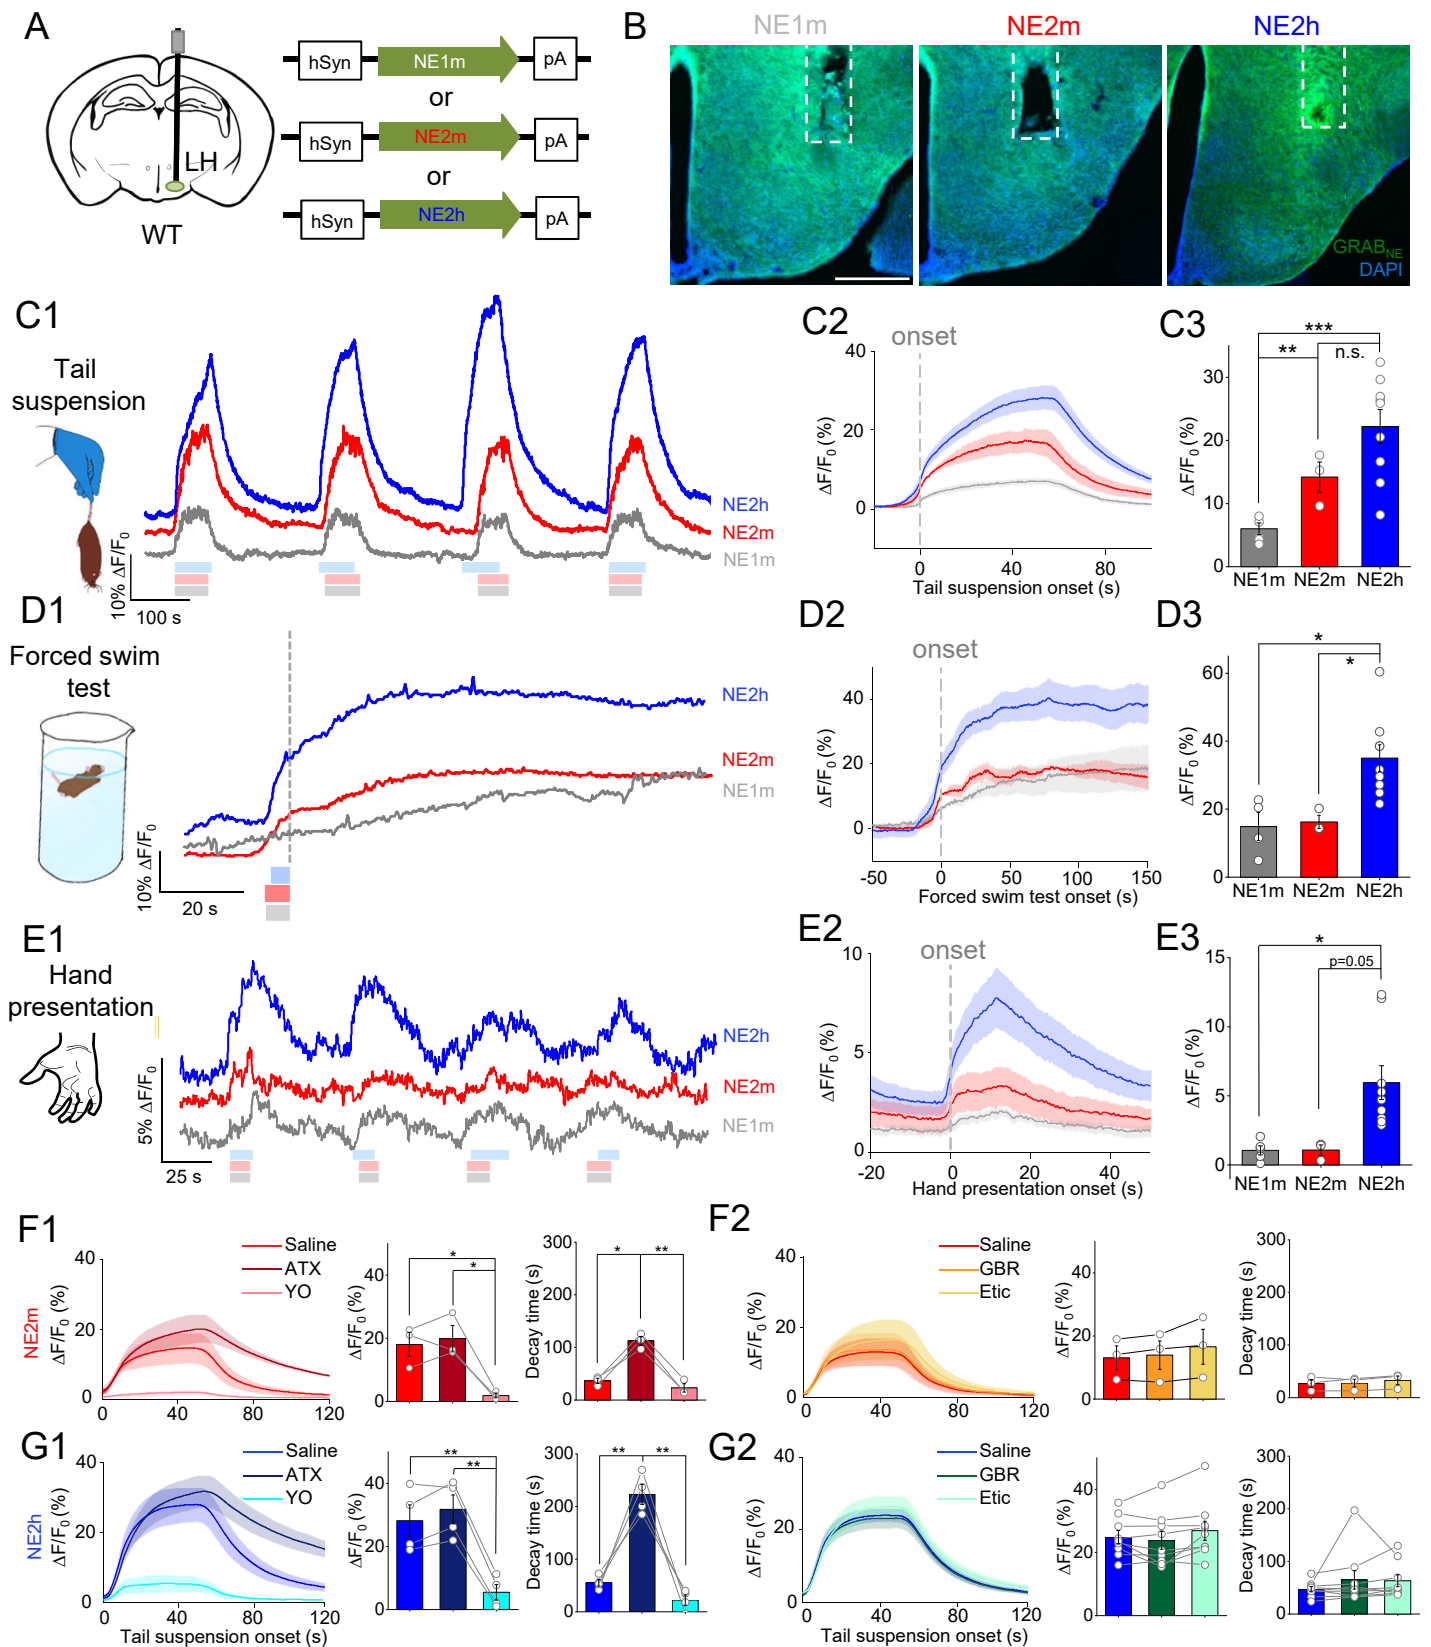

**Figure 3. Next-generation NE Sensors report behaviorally evoked NE release *in vivo* in response to stressful stimuli.**

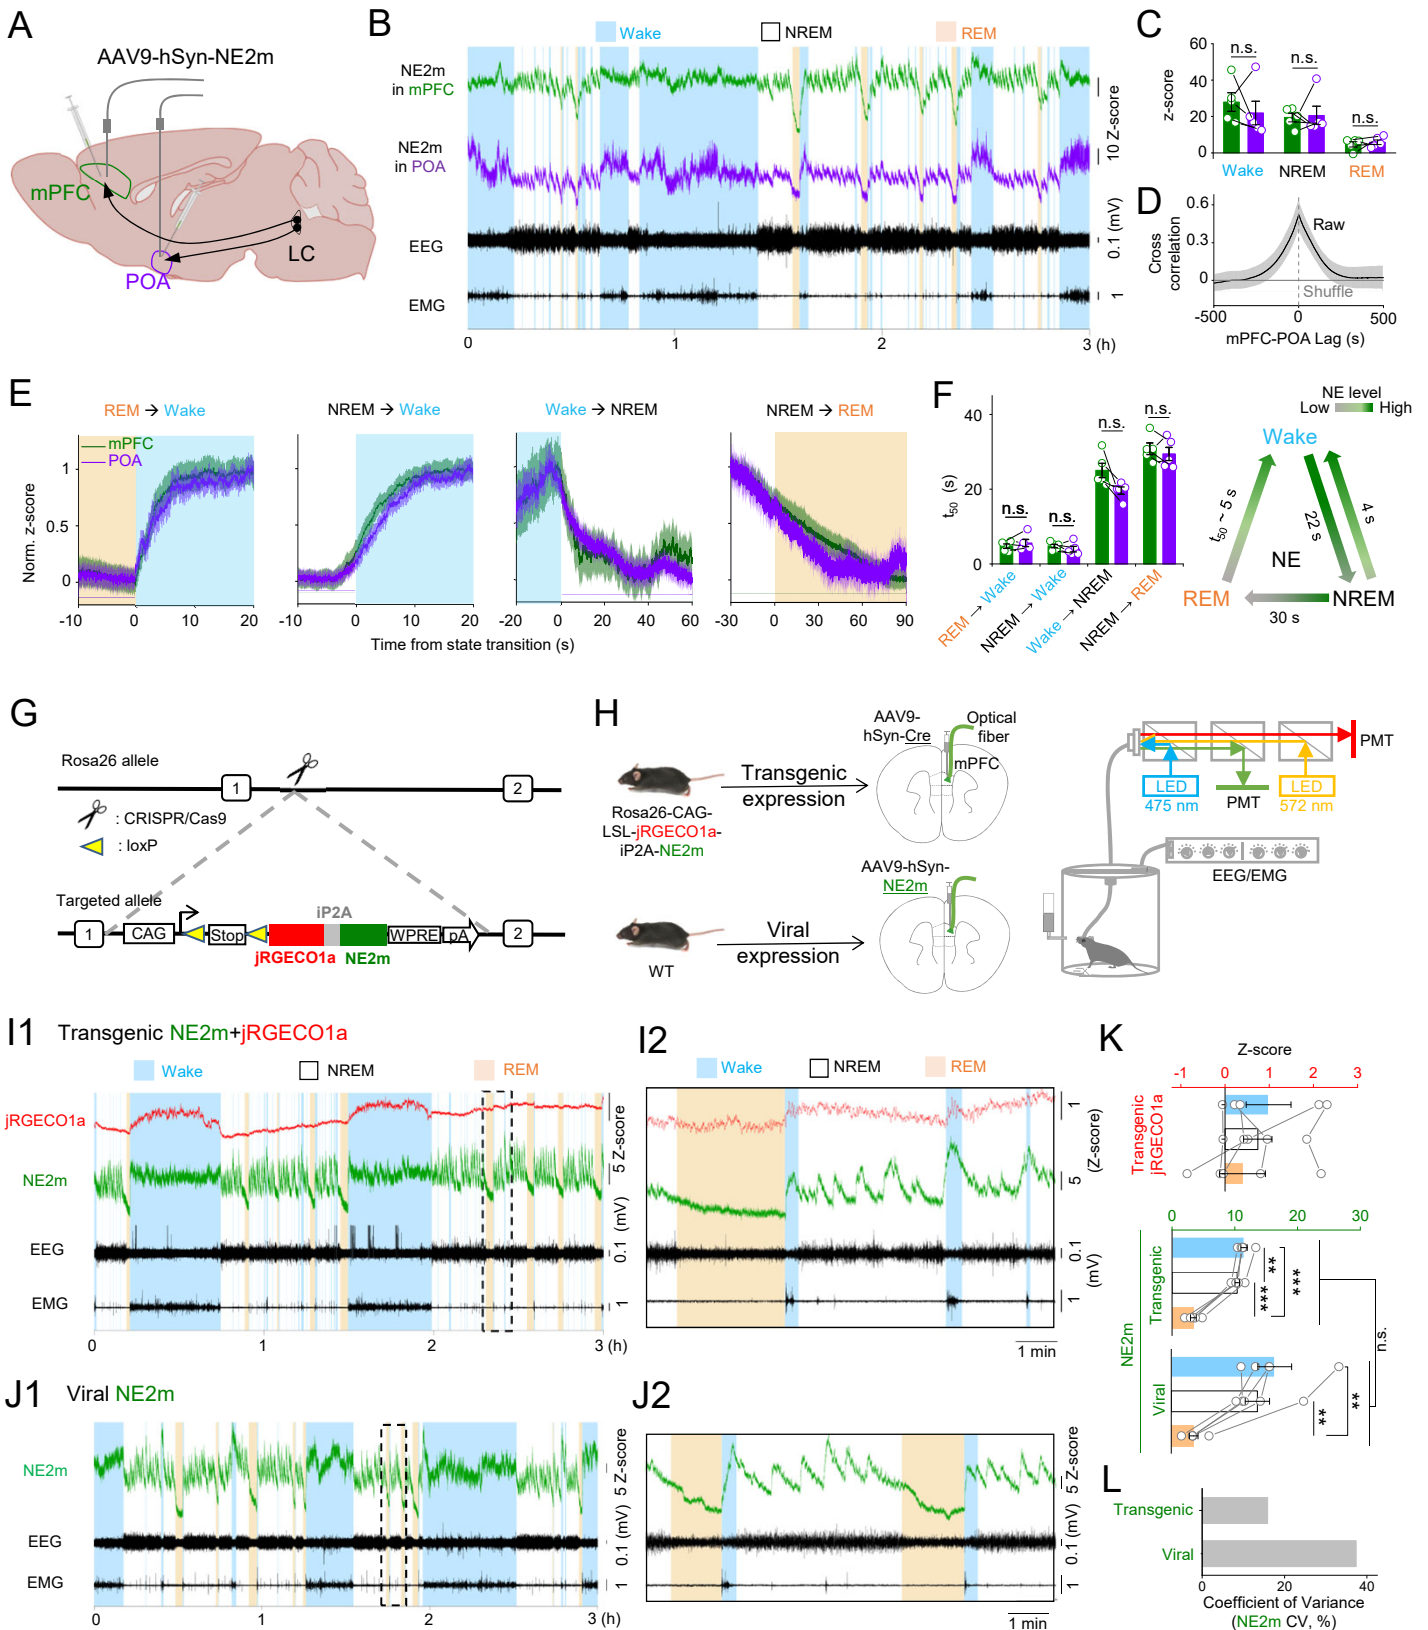

**Figure 4. NE and calcium dynamics during the sleep-wake cycle.**



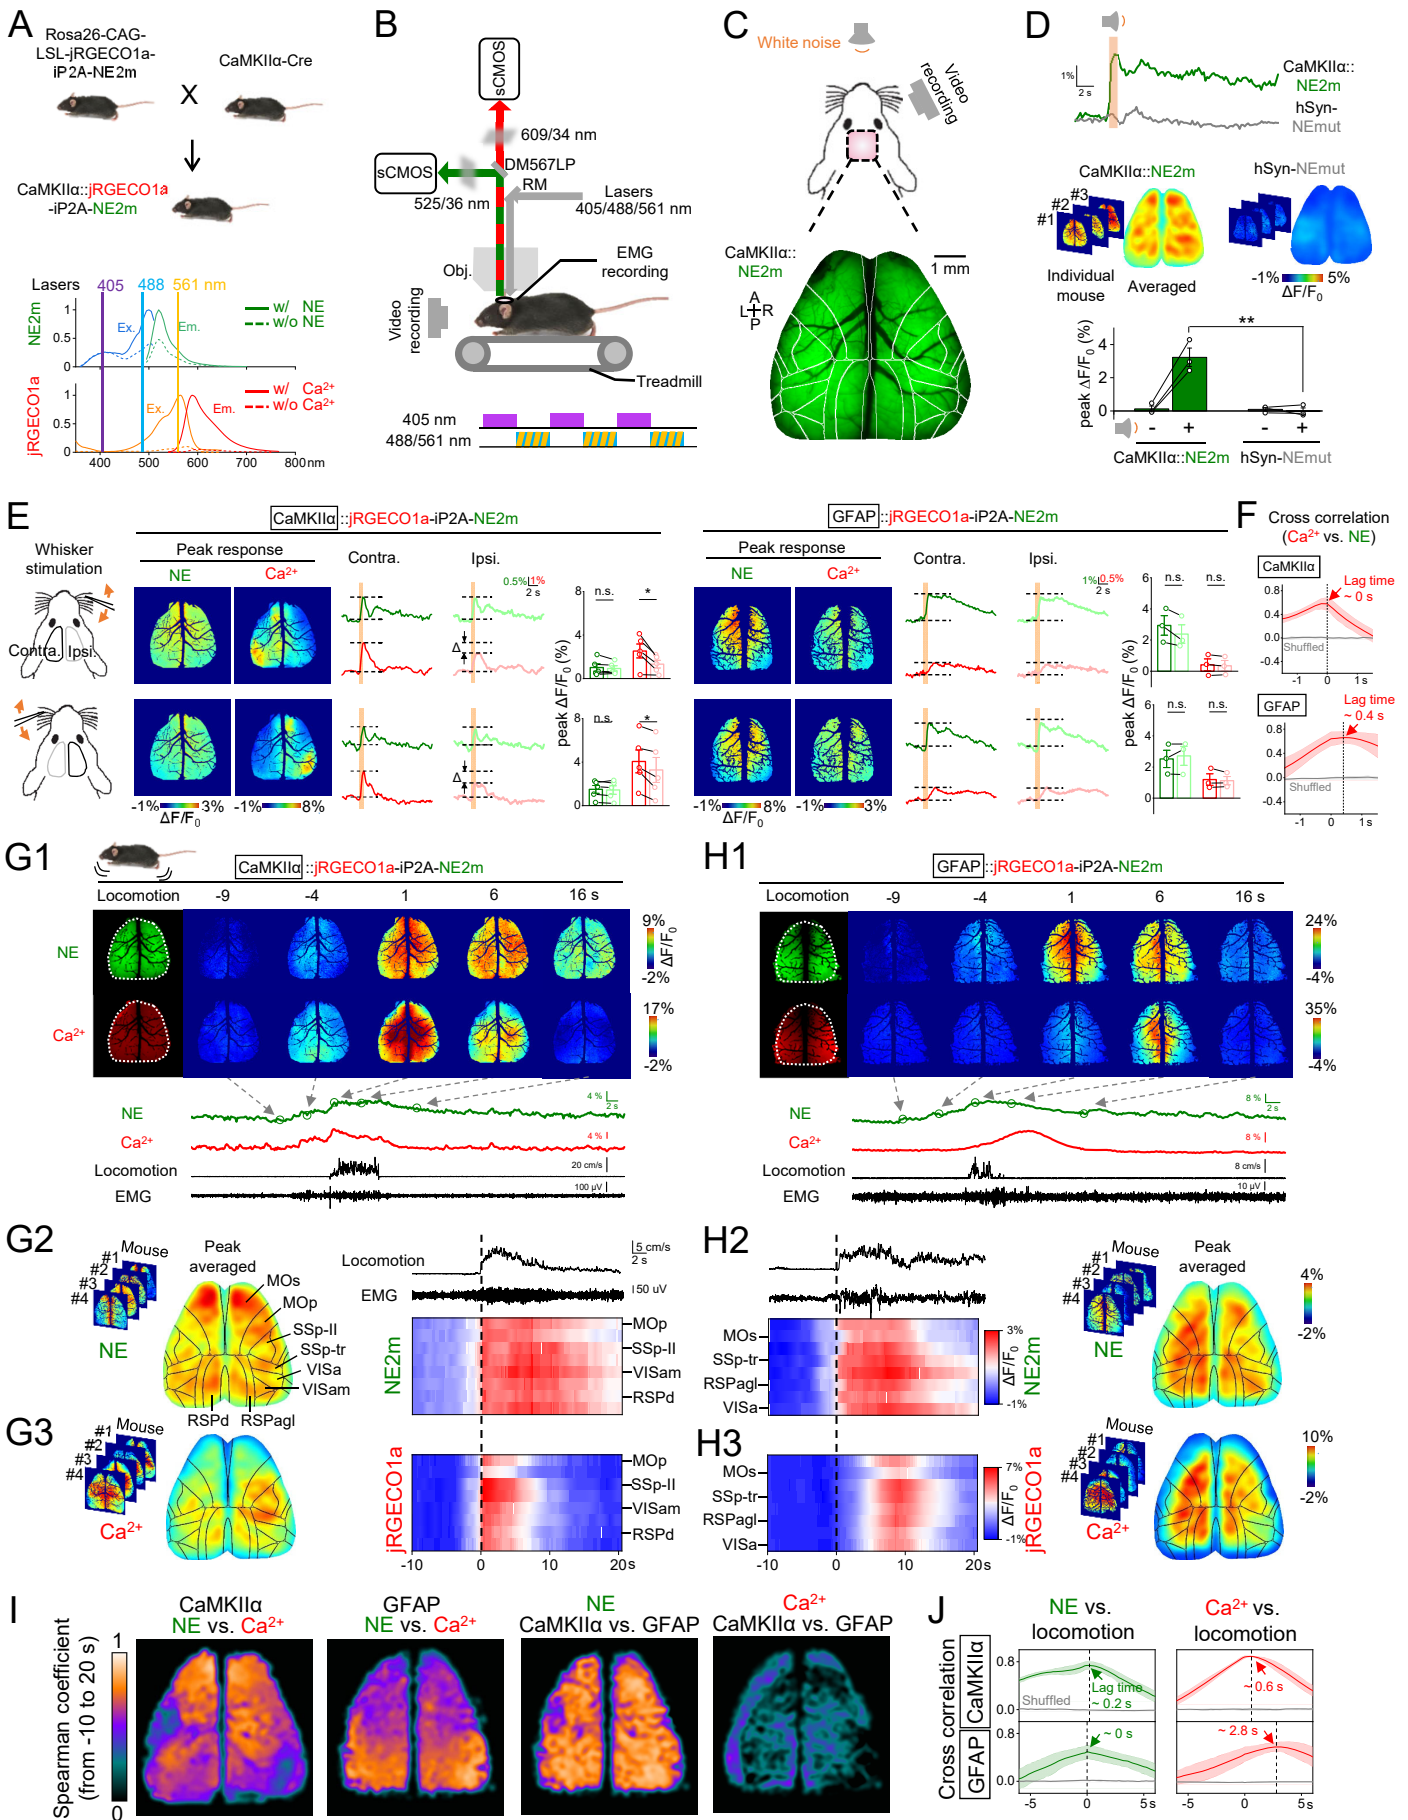

**Figure 5. Mesoscopic NE and calcium dynamics in dorsal cortex of awake mice.**

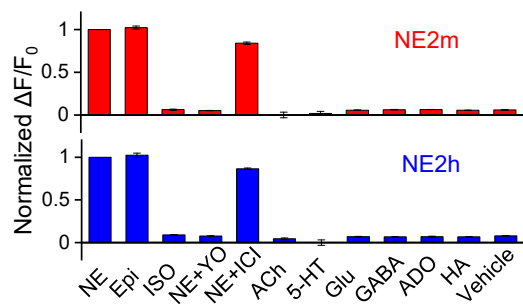

**Figure S1. Selectivity of next-generation GRAB<sub>NE</sub> sensors (related to Figure 1).**

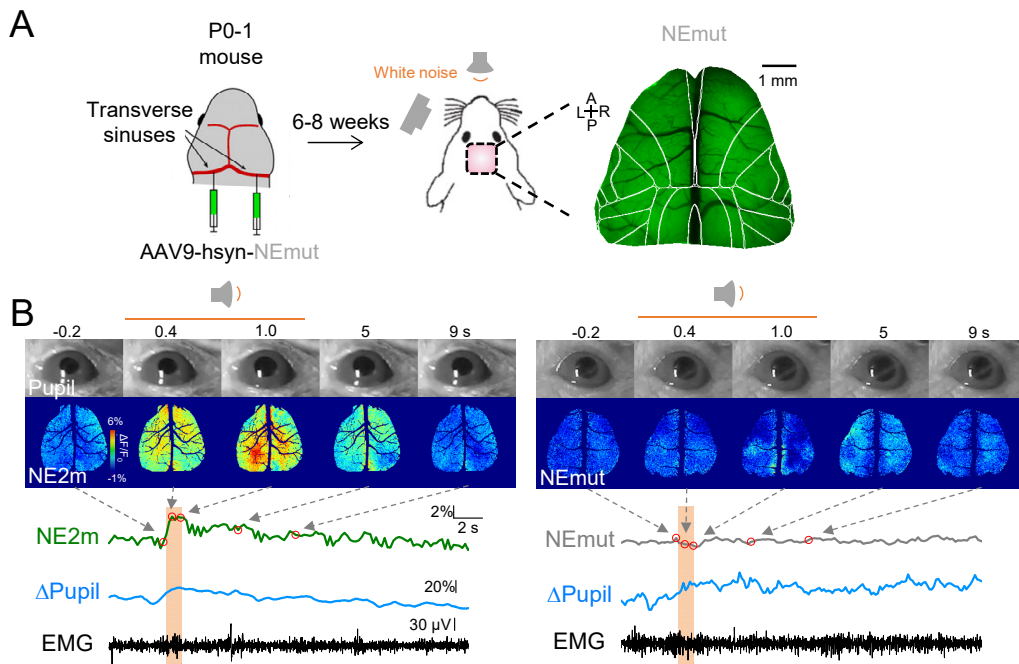

**Figure S2. GRAB<sub>NE2m</sub> and GRAB<sub>NEmut</sub> fluorescence measure during audio stimulation (related to Figure 5).**



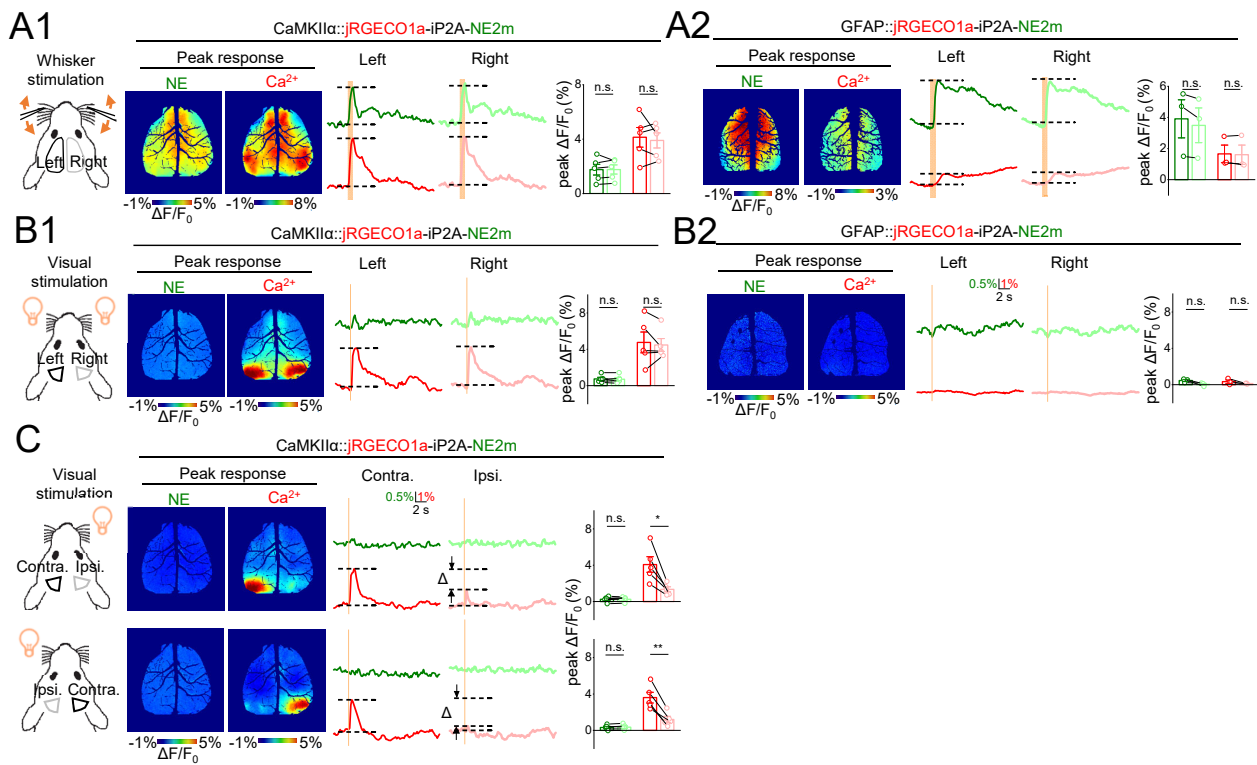

**Figure S3. Mesoscopic NE and calcium dynamics in dorsal cortex of awake mice (related to Figure 5).**
